# Supplementary material
Source: PubMed Central journal article supplement (PMC7261494)
Supplement: NIHMS1590802-supplement-Supplementary_Materials.pdf [file NIHMS1590802-supplement-Supplementary_Materials.pdf]

# Visualization of the Cellular Uptake and Trafficking of DNA Origami Nanostructures in Cancer Cells

Pengfei Wang<sup>1†</sup>, Mohammad Aminur Rahman<sup>2†</sup>, Zhixiang Zhao<sup>2,3</sup>, Kristin Weiss<sup>1</sup>, Chao Zhang<sup>5</sup>, Zhengjia Chen<sup>5</sup>, Selwyn J. Hurwitz<sup>4</sup>, Zhuo G. Chen<sup>2</sup>, Dong M. Shin<sup>1,2\*</sup>, and Yonggang Ke<sup>1,6\*</sup>

<sup>1</sup> Wallace H. Coulter Department of Biomedical Engineering, Georgia Institute of Technology and Emory University, Emory University School of Medicine, Atlanta, GA 30322, USA

<sup>2</sup> Department of Hematology and Medical Oncology, Winship Cancer Institute, Emory University School of Medicine, Atlanta, GA 30322, USA

<sup>3</sup> Department of Dermatology, Xiangya Hospital, Central South University, Changsha, Hunan 410083, China.

<sup>4</sup> Department of Pediatrics, Emory University School of Medicine, Atlanta, GA 30322, USA.

<sup>5</sup> Department of Biostatistics and Bioinformatics Shared Resource, Winship Cancer Institute, Emory University Rollins School of Public Health, Atlanta, GA 30322, USA

<sup>6</sup> Department of Chemistry, Emory University, Atlanta, GA 30322, USA

Corresponding Author Contact Information:

[yonggang.ke@emory.edu](mailto:yonggang.ke@emory.edu), [dmschin@emory.edu](mailto:dmschin@emory.edu)

† These authors contributed equally

## **Section 1. Materials and Methods**

### **Design of DNA origami nanostructures**

DNA nanoparticles were designed using software called cadnano. p7560 scaffold DNA was amplified and extracted from M13 bacteriophage following a published protocol.<sup>1</sup> p425 scaffold was cut from p7560 by restriction enzyme. All oligonucleotides and siRNA were purchased from IDT and used as received.

### **Preparation of p425 scaffold**

p425 scaffold DNA was acquired from p7560 by restriction digestion using enzyme BsaAI (NEB, Catalog # R0531L). In a typical restriction reaction with volume of 100  $\mu$ L, 500 nM of p7560 was mixed with 5000 nM of helper strands (sequences) in 1 $\times$  cutsmart buffer added with 5  $\mu$ L of BsaAI (5 U/ $\mu$ L). The mixture was incubated at 37°C for 3 hours following a 20 min heat inactivation at 65°C. The reaction solution was then subject to 0.7% agarose gel electrophoresis and the p425 DNA band was dissected out and extracted from gel using a Zymoclean™ Gel DNA Recovery Kit from Zymo Research (Catalog # D4008).

### **Assembly of DNA origami nanostructures**

Small tetrahedron (ST), small rod (SR), large tetrahedron (LT), and large rod (LR) were prepared by mixing 5 fold of staple strands with 1 fold of scaffold DNA (p425 for ST and SR, p7560 for LT and LR) in an aqueous buffer containing 5 mM of Tris base, 1 mM of EDTA, and 10 mM of MgCl<sub>2</sub>. The mixture was then subject to the following thermal annealing protocol: 65°C for 5 min, 60°C to 25°C over a period of 18 hours. Excessive staple DNA was removed using Amicon 100 KDa centrifugal filter with a centrifugation speed of 3000 G and a minimal of 3 times of washing to completely remove free DNA staple strands. DON concentrations were calculated from UV absorbance at 260 nm. Fluorophore (Cy5 or Alexa488) conjugated DNA was loaded onto DONs at a molar ratio of fluorophore-DNA: Handle = 1: 1. After thorough mixing, the solutions were incubated for at least 2 hours at room temperature under constant shaking prior to subsequent experiments.

### **Attaching gold nanoparticles onto DONs for TEM studies**

Gold nanoparticles (AuNPs) with diameter of 5 nm were tethered with 5'-SH-TTTTTTTTTT TTTTTTTTTT-3' following a previously published protocol.<sup>2</sup> DNA-tethered AuNPs were then added to LR (36 handles on Face-1) at a molar ratio of LR: AuNP = 1: 30 under room temperature for 2 hours. The mixed solution was then subject to a 1% native agarose gel electrophoresis and the product band was excised and extracted using Freeze 'N Squeeze column. No EtBr was added for this experiment to avoid introducing cytotoxicity to cellular studies.

### **Agarose gel electrophoresis**

DONs were subjected to 1% of native agarose gel electrophoresis for 2 hours (gel prepared in 0.5 $\times$ TBE buffer supplemented with 10 mM MgCl<sub>2</sub> and 0.005% (v/v) EtBr). If product purification is necessary, the target gel bands were excised and placed into a Freeze 'N Squeeze column (Bio-Rad Laboratories, Inc.). The gel was crushed into fine pieces by a microtube pestle in the column, and the column was then centrifuged at 7000 g for 5 minutes. Samples that were extracted through the column were collected for TEM or AFM imaging.

### **Atomic force microscopy**

AFM images were obtained using a Multimode 8 system under peak force tapping mode (Bruker). 5  $\mu\text{L}$  of purified sample was applied onto the surface of a freshly cleaved mica chip and left for approximately 2 minutes to allow for adsorption. 60  $\mu\text{L}$  of 1 $\times$ TE buffer with 10 mM  $\text{MgCl}_2$  was then added onto the mica surface. The AFM tip used was on the short and thin cantilevers in the SNL-10 silicon nitride cantilever chip (Bruker).

### **Transmission electron microscopy**

For imaging of DONs, 3  $\mu\text{L}$  of samples were adsorbed for 30 minutes onto glow-discharged, carbon-coated TEM copper grids. The grids were then stained for 10 seconds using a 1% aqueous uranyl formate solution containing 10 mM NaOH. Imaging was performed using a Hitachi 7700 microscope operated at 80 kV.

For imaging of cells, H1299 cells (~60,000) were seeded into 24-well plate and incubated with AuNP tagged LRs (AuNP concentration of 2.5 nM) at 37°C for designated time points. Wash and then fix the cells twice with 2.5% glutaraldehyde in 0.1 M cacodylate buffer (pH 7.4). Cells were then rinsed with 0.1 M cacodylate buffer twice before post-fixation in 1% osmium tetroxide for 1 hour. After additional buffer rinses, cells were dehydrated through an ethanol series to 100% ethanol. Cells were infiltrated with a mixture of 100% ethanol and Eponate 12 resin for 3 hours, and then pure Eponate 12 resin overnight. Cells were embedded in multiwall plate and then placed in a 60°C oven for polymerization. Ultrathin sections were cut on a Leica UltraCut microtome at 70-80 nm and placed on Formvar and carbon coated 200 mesh copper grids. Sections were then stained with 5% uranyl acetate for 15 mins followed by 2% lead citrate for 15 mins. Cells were then imaged with a Hitachi 7700 microscope operated at 80 kV.

### **Nuclease resistance study**

20  $\mu\text{L}$  of DONs (mass: 400 ng) was added with 2.2  $\mu\text{L}$  of non-heat-inactivated fetal bovine serum (FBS) to reach a final concentration of 10% FBS. The solutions were then immediately incubated at 37°C within a thermal cycler for designated time (from 0 to 16 hours). Right after incubation, all samples were run on a 1% native agarose gel electrophoresis.

### **Cell Culture**

H1299 lung cancer cell lines were kindly provided by Dr. Shi-Yong Sun (Emory University, GA). This cell line was maintained in RPMI 1640 with 10% FBS. Cells were maintained in a humidified incubator at 37°C, 5%  $\text{CO}_2$ . DMS53 cell lines were kindly provided by Dr. Shingming Deng (Emory University). SCLC cell lines DMS53 cell line was kindly provided by Dr. Xingming Deng (Emory University). DMS53 cultured in Weymouth's medium supplemented with 5% FBS as previously described (PMID:23824742).

### **Confocal Microscopy**

Cells were incubated with Cy5-labeled DON structures (250nM) on glass coverslips (Lab-Tek II chamber slide, Nunc International) at 37°C for different time points. Then washed three times with PBS and fixed with 4% paraformaldehyde. Nuclear staining was performed by mounting Pro-Longed gold anti-fade reagent with DAPI (Invitrogen, Carlsbad CA). Cells were imaged on Leica Sp8 inverted microscope. For localization studies in H1299 cells (~18,000) into 4-well

chambered glass and incubate at 37°C over-night for cells to settle down. For lysosome staining, cells were treated with lyso-Tracker Green DND-26 at the concentration of 1µM together with DONs-Cy5 at the concentration of 250nM for 8 hours. For nucleus staining, add Hoechst 33324 to the concentration of 1µg/ml then incubate for 30mins. Wash the cells with PBS, and then add 500µL FluoroBrite DMEM Media before the cells are subject to confocal microscope.

### **Flow Cytometry for DONs cell internalization study**

DMS53 and H1299 cells (~60,000) were seeded into 24-well plate and incubated with different structures of DONs-Cy5 or DONs-Alexa488 at 37°C for different time points. After washing the cells twice with PBS, we collected cell for flow cytometry analysis. Flow Jo software was used to quantify the % of Cy5 or Alexa positive cells as well as median intensity of the signal.

### **Quantitative polymerase chain reaction**

H1299 cells (~60,000) were seeded into 24-well plate and incubated with DONs (7 nM) at 37°C for 4 hrs. After treatment, cells were washed twice using PBS and incubated for 15 min in PBS containing 0.5 U/µL Benzonase to degrade DONs adsorbed onto the well plate. Cells were subsequently washed, trypsinized, collected, counted and lysed using 250 µL DNAzol Reagent. After careful mixing, lysates were transferred to new tubes and left for 15 min. The mixtures were then centrifuged for 10 min at 7000 RPM. Supernatant were carefully recovered, added with 250 µL of 100% ethanol, inverted 2–3 times, and left for 15 min at -20 °C before centrifugation for 10 min at 13000 RPM. Supernatant were carefully removed and the pellets (invisible) were washed with 500 µL of 75% cold ethanol once and then left air dry. DNA was dissolved in 50 µL of 8 mM NaCl and stored at -20 °C for later PCR reactions. SR solutions with known numbers were used as standards for small DONs, and LRs were used as standards for large DONs. The primers were designed to target p425 scaffold DNA (and p7560 scaffold DNA since p425 DNA is part of p7560 DNA) with an amplicon size of 254 bp (Forward primer: CTGGTCGTGTGACTGGTGAA; Reverse primer: ATCAGTGAGGCCACCGAGTA). PCR reactions were performed in 20 µL of total volume containing 10 µL of SYBR Green qPCR SuperMix (Bio-Rad Laboratories, USA), 1 µL of primers (0.5 µM), 1 µL of template, and 8 µL of nuclease free water. All components were mixed in 96-well plates. The thermal conditions during reaction were 2 min at 50 °C, 10 min at 95 °C followed by 40 thermal cycles at 95 °C for 15 s and 60 °C for 1 min. Each reaction was run in duplicates. C<sub>t</sub> values were acquired (using Applied Biosystem 7500) for each reaction and used for standard curve plotting and DONs copy number calculations.<sup>3</sup>

### **Pharmacological inhibition study**

For cellular internalization pathway, DMS53, H1299, or HeLa cells (~60,000) were seeded into 12-well plate and incubate at 37°C overnight for cells to settle down. To inhibit Scavenger receptor, pre-treat the cells with Poly I at the concentration of 40 µg/ml for 30 mins; Cytochlasin D at the concentration of 0.25 µM for 15mins to block non-receptor mediated endocytosis; MβCD at the concentration of 625 nM for 30 mins to block caveolin-dependent endocytosis; Sucrose at the concentration of 100 mM for 30 mins to block clathrin-dependent endocytosis. Add DONs-Cy5 at the concentration of 250 nM then incubate for 8 hours with the presence of chemicals. Wash the cells with PBS and collected for flow cytometry analysis.



## Statistical Analysis

All flow cytometry results represent the average of three independent experiments and are expressed as mean $\pm$ SD. One-way ANOVA were used to compare the difference among the 3 experiments. P-value less than or equal to 0.05 is considered statistically significant.

## Section 2. Additional Figures and Tables

Table S1. Specific design parameters of DONs. Loading site refer to the number of fluorophore being loaded onto DONs.

| DNP | Scaffold (nt) | Mass (bp) | Dimensions (nm <sup>3</sup> ) | Loading sites |
|-----|---------------|-----------|-------------------------------|---------------|
| ST  | 425           | 384       | 4x2x11 per edge               | 24            |
| SR  | 425           | 396       | 4x4x32                        | 28            |
| LT  | 7560          | 6456      | 7.2x12x47 per arm             | 36            |
| LR  | 7560          | 6144      | 8x8x127                       | 36            |

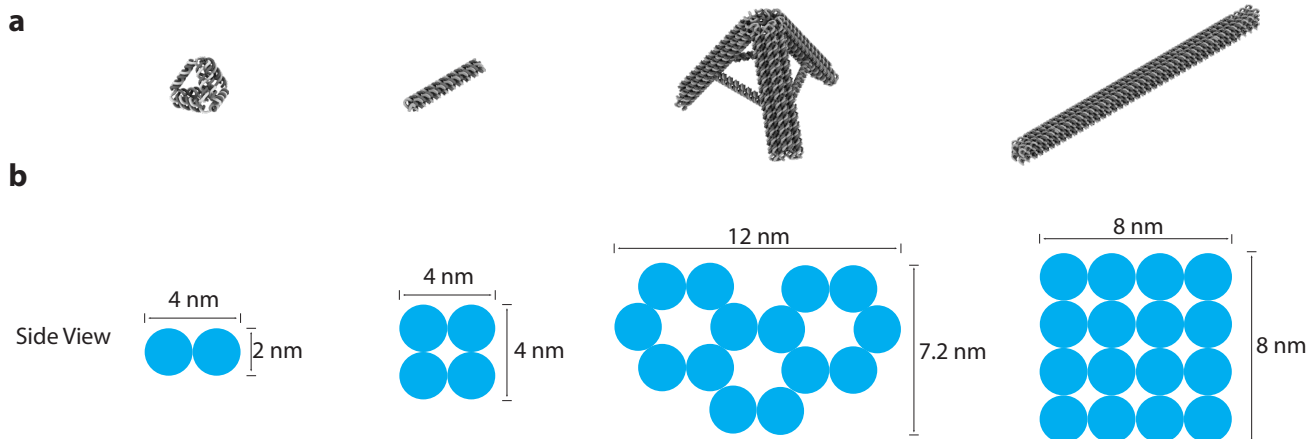

Figure S1. Schematic illustrations on calculating DONs dimensions. **a.** 3D schematics of DONs. **b.** Side view of ST's edge, SR, LT's arm, and LR.

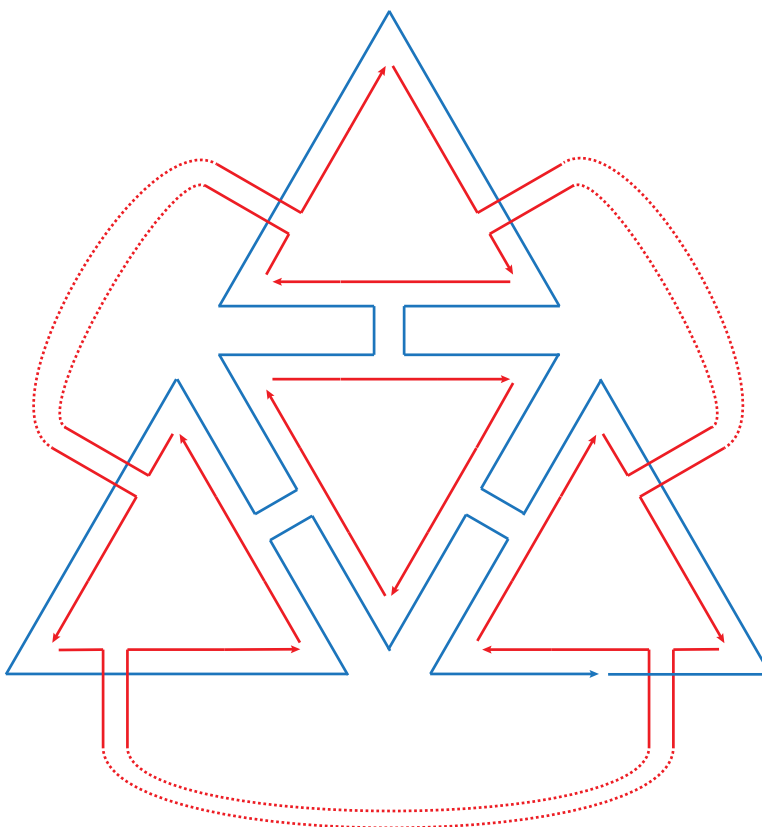

Figure S2. Strand diagram of ST. Scaffold DNA: blue; Staples: red. Single stranded DNA handles are extended from both the 5' and 3' ends of staples for capturing of fluorophore.

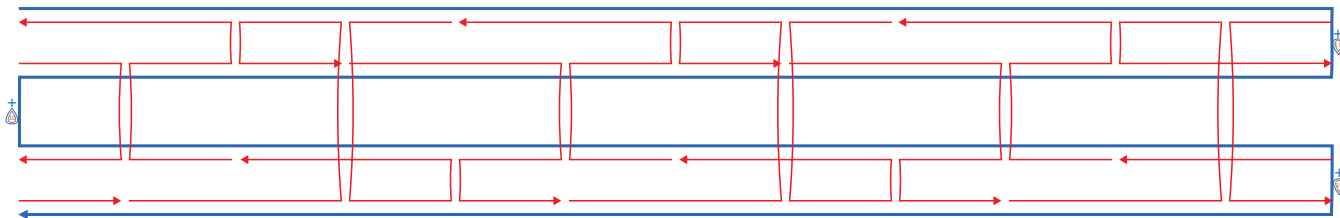

Figure S3. Strand diagram of SR. Scaffold DNA: blue; Staples: red. Single stranded DNA handles are extended from both the 5' and 3' ends of staples for capturing of fluorophore.

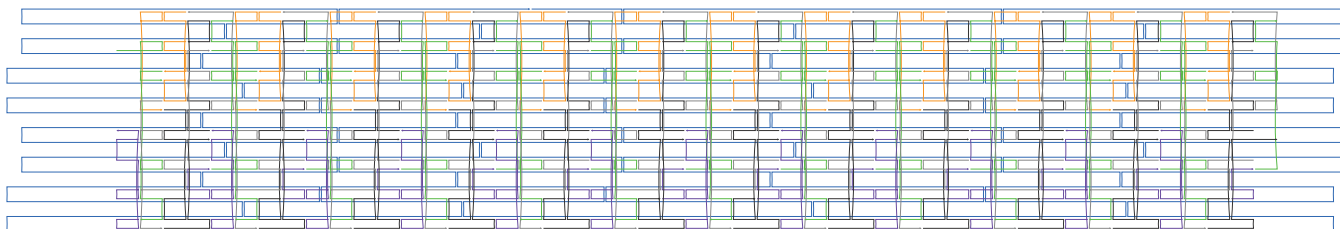

Figure S4. Strand diagram of LR. Scaffold DNA: blue; Staples: orange (Face-1), green (Face-2), black (Face-3), pink (Face-4), and grey (core). Single stranded DNA handles are extended from 5' end of orange staples on Face-1 for capturing fluorophore.

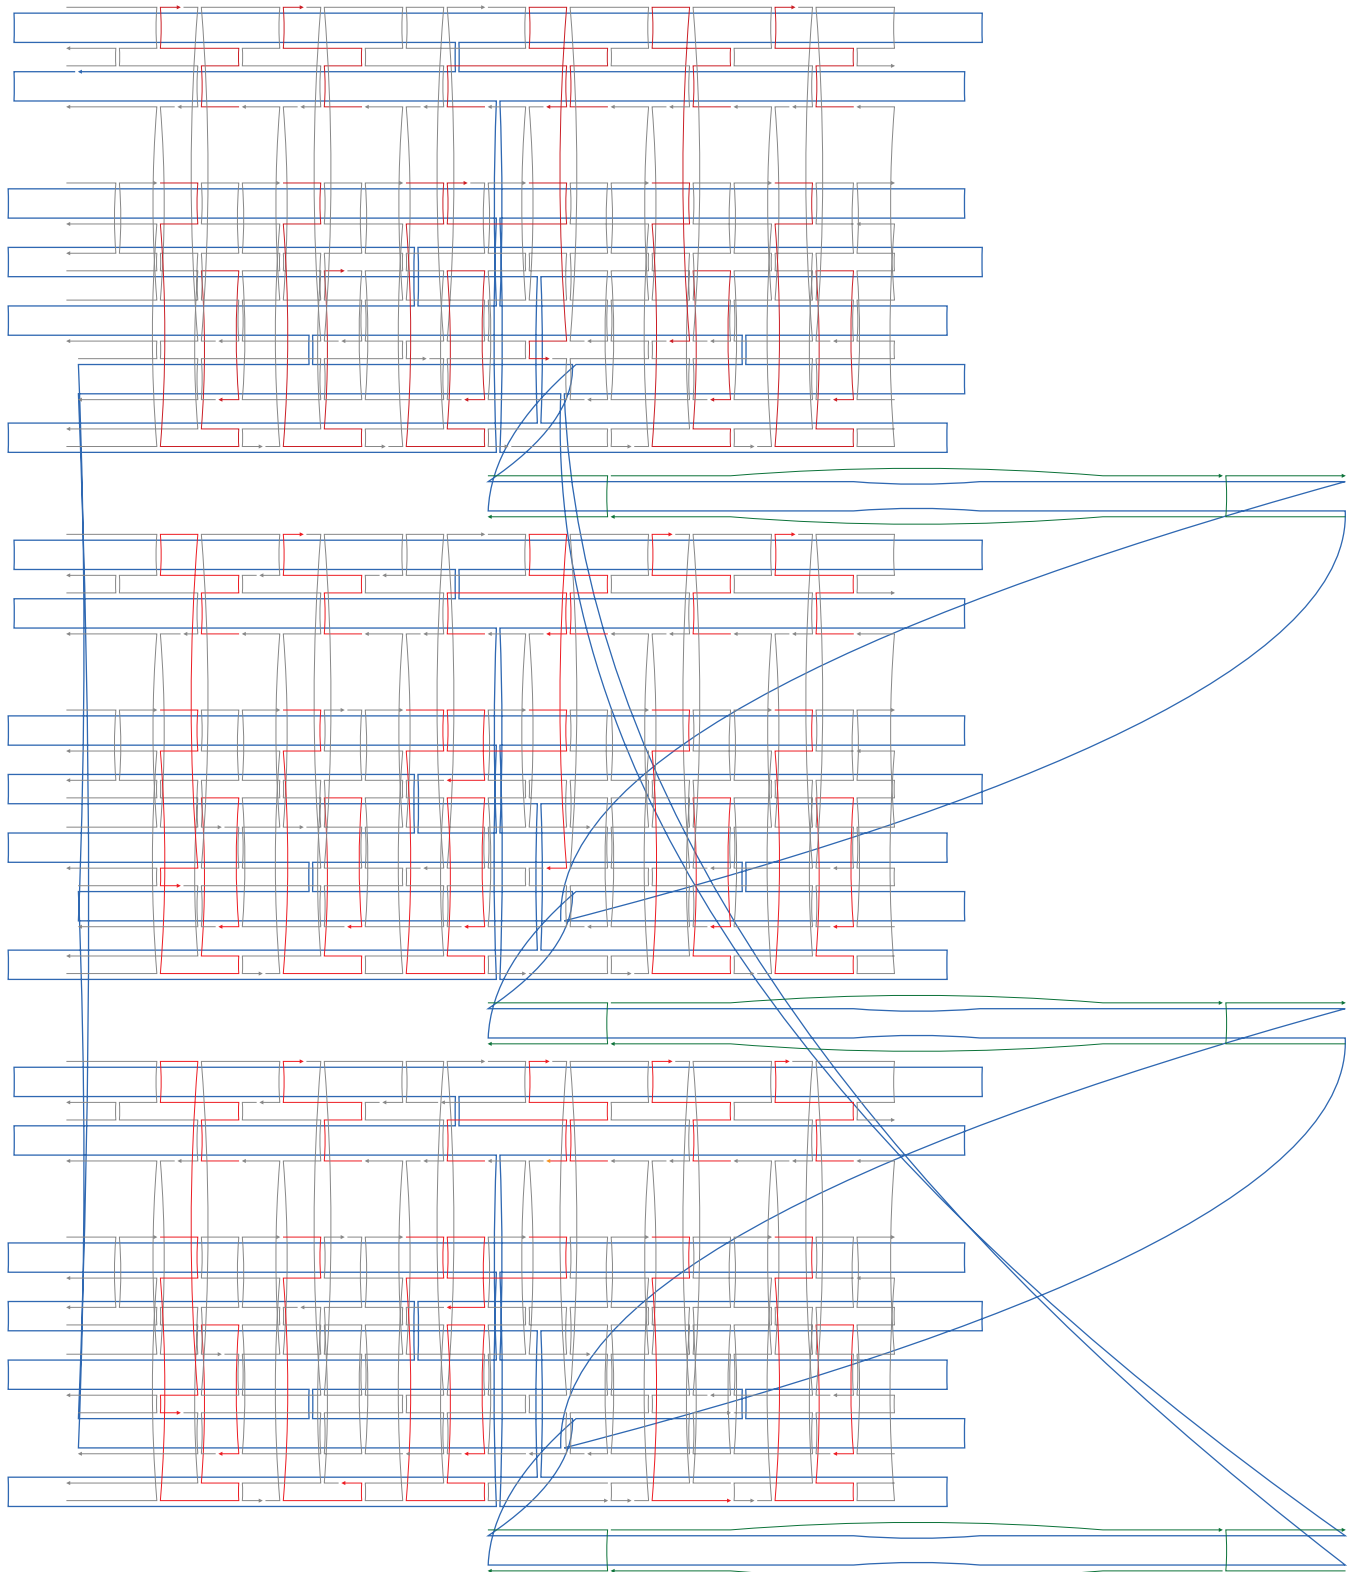

Figure S5. Strand diagram of LT. Scaffold DNA: blue; Staples: red, green, and grey. Single-stranded DNA handles are extended from 5' end of red staples for capturing Cy5-DNA.

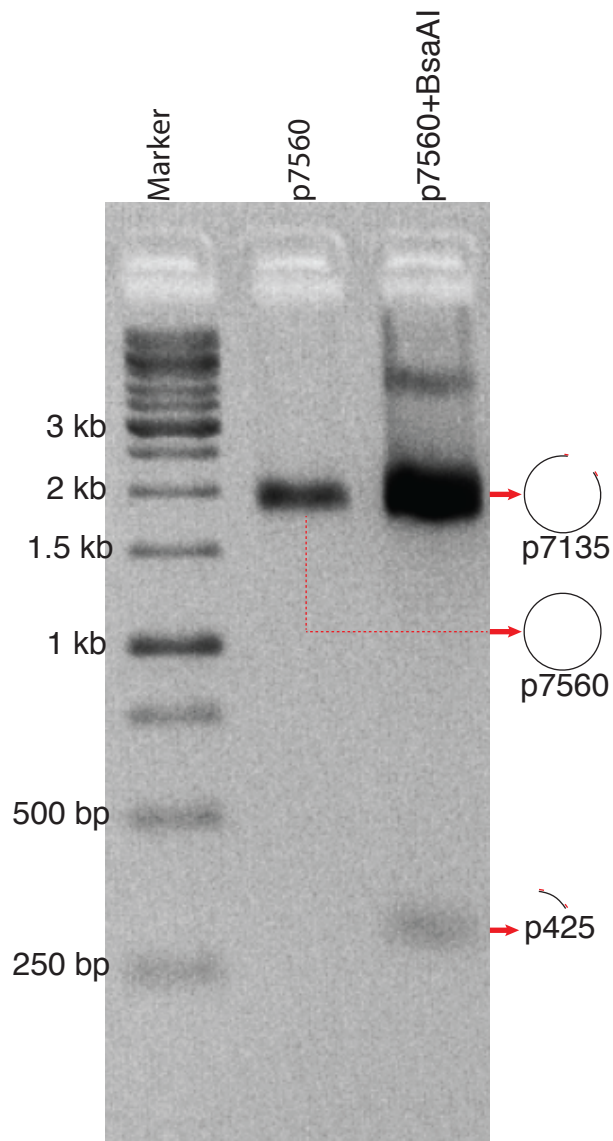

Figure S6. Preparation of p425 by cutting p7560 using BsaAI. Agarose gel electrophoresis (1%) showed the successful production of p425.

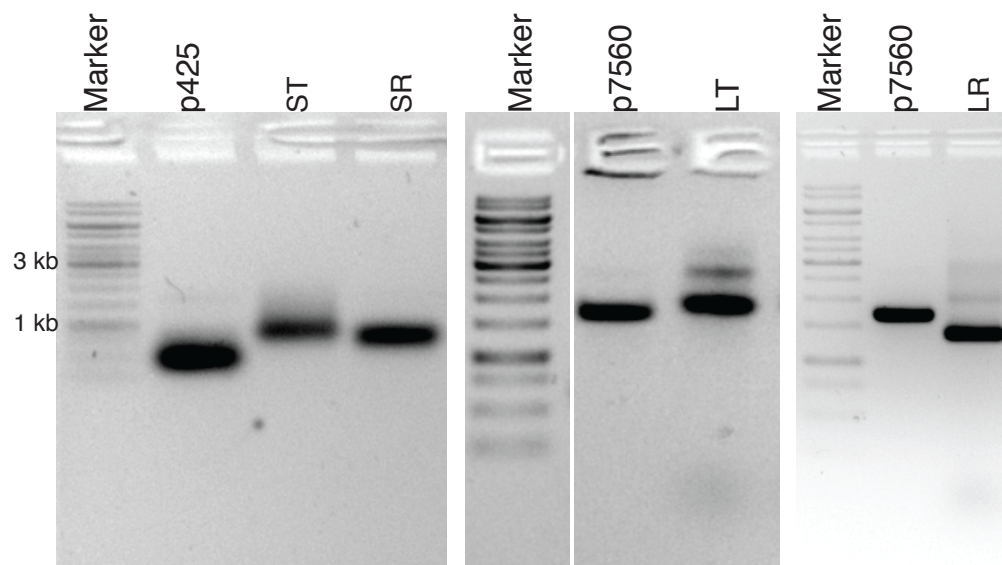

Figure S7. Agarose gel electrophoresis (left: 1.5%, middle and right: 1%) of purified DONs with excessive staples removed by cut-off filters. Discrete bands with expected motilities suggest the successful formation of DONs.

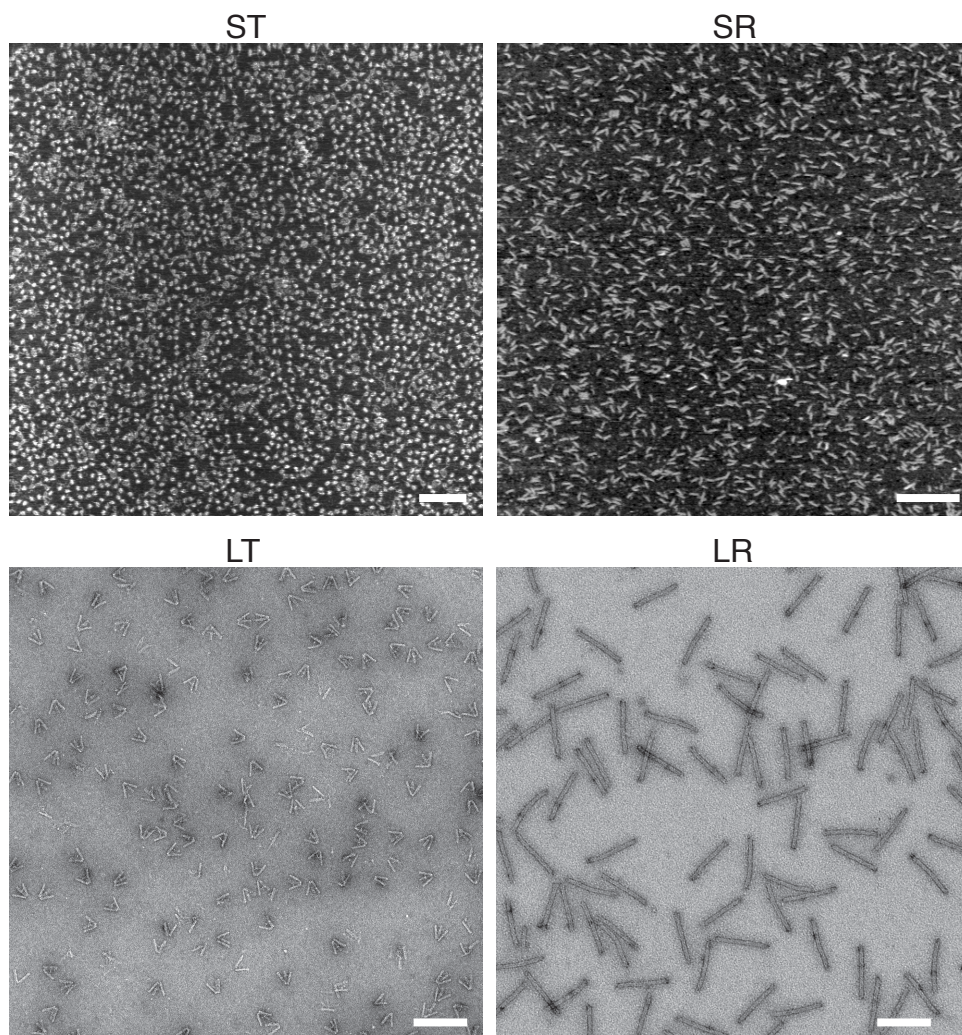

Figure S8. Large scale AFM (for ST, SR) and TEM (for LT, LR) images of DONs. Scale bars: 200 nm.



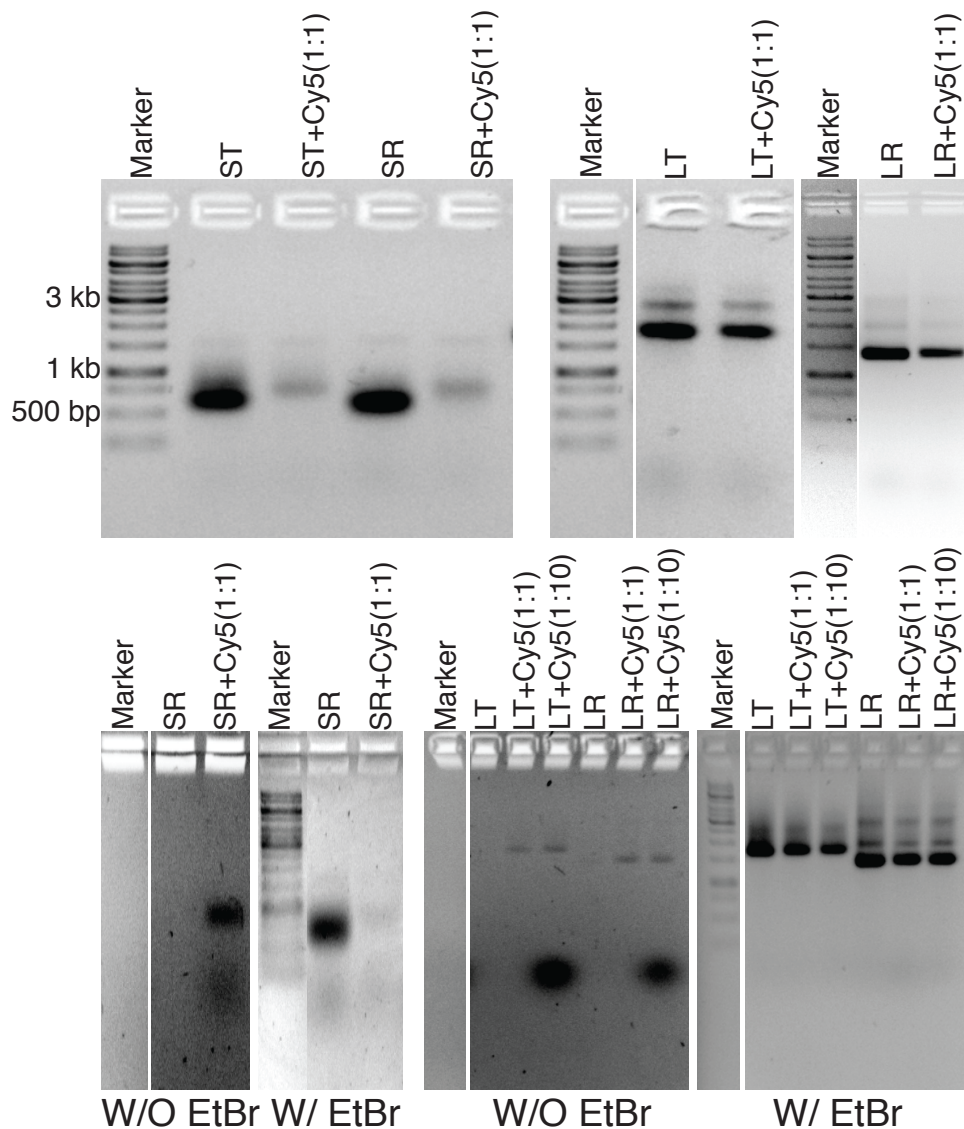

Figure S9. Attachment of Cy5-DNA onto DONs. The presence of Cy5 dimmed the fluorescence of EtBr possibly due to fluorescence resonance energy transfer (FRET) where the emission light of EtBr was absorbed by Cy5. Without EtBr staining, SR-Cy5, LT-Cy5, and LR-Cy5 showed visible bands due to Cy5 fluorescence under UV excitation that exhibited same mobility while under EtBr staining, confirming the successful loading of Cy5-DNA onto DONs. No free Cy5-DNA was observed in the gel at ratio of 1:1 for LT-Cy5 and LR-Cy5, and the presence of excessive amount of Cy5-DNA at ratio of 1:10 led to no observable increase in LT-Cy5 and LR-Cy5 band intensity comparing to that ratio of 1:1, indicating that Cy5-DNA was efficiently loaded onto DONs.



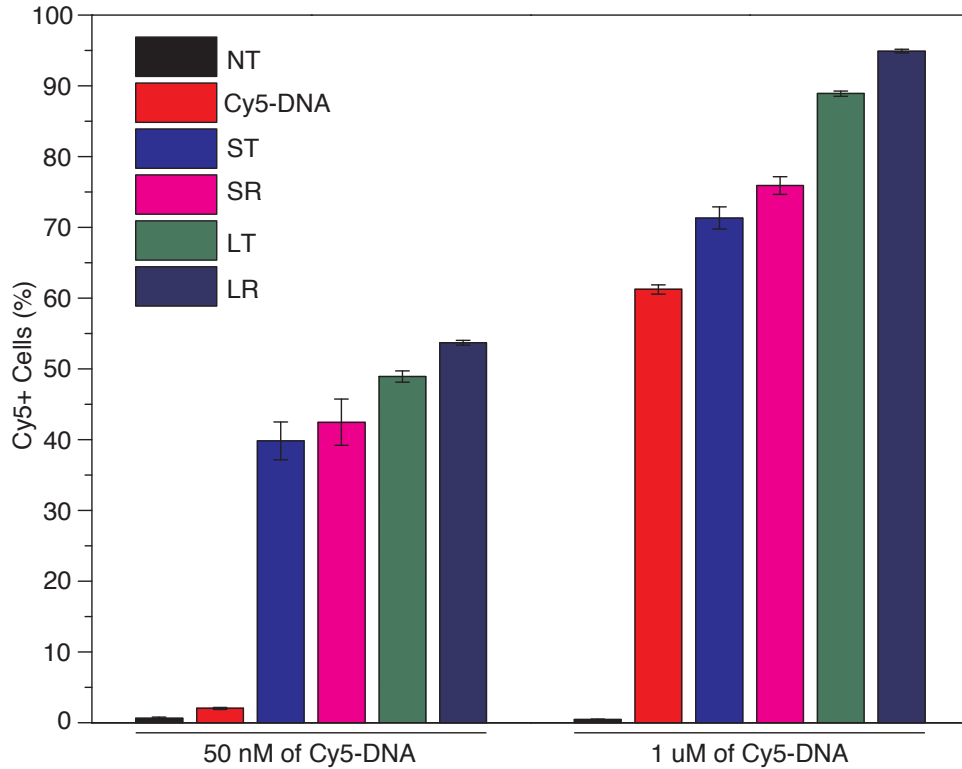

Figure S10. Concentration dependency of DONs uptake into H1299 cells after 4 hours of incubation. Similar trend in DONs cellular uptake was observed at Cy5 concentration of 50 nM and 1 uM comparing to 250 nM (Figure 3a), with larger DONs exhibiting higher uptake efficiency. Well, Cy5-DNA had significant cellular uptake by itself at 1 uM concentration, suggesting that Cy5-DNA may interfere DONs uptake at this condition, thus lower concentration shall be used (e.g. 250 nM).

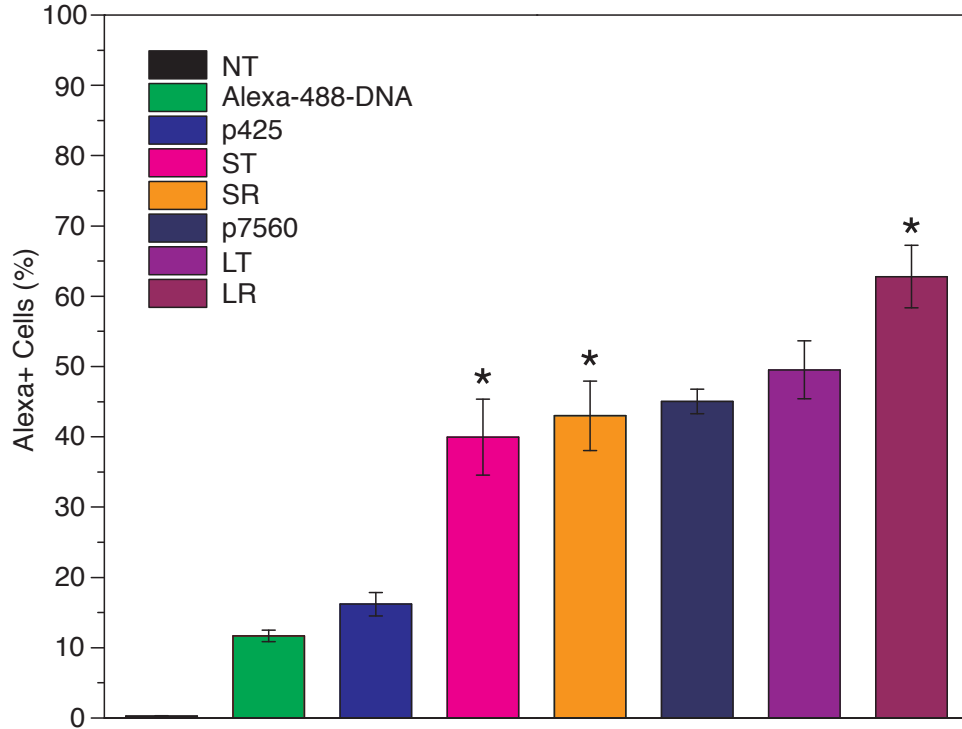

Figure S11. DONs uptake into H1299 cells after 4 hours of incubation with Alexa-488 as the tracking fluorophore at concentration of 250 nM. Similar trend was observed comparing to same experiments with Cy5 as the fluorophore (Figure 3a). ST and SR had higher uptake efficiency than p425 ( $*P < 0.05$ ), while p7560 exhibited similarly cell uptake as LT but lower uptake efficiency than LR ( $*P < 0.05$ ). All DONs exhibited significantly higher uptake efficiency than Alexa-488-DNA alone ( $*P < 0.05$ ).

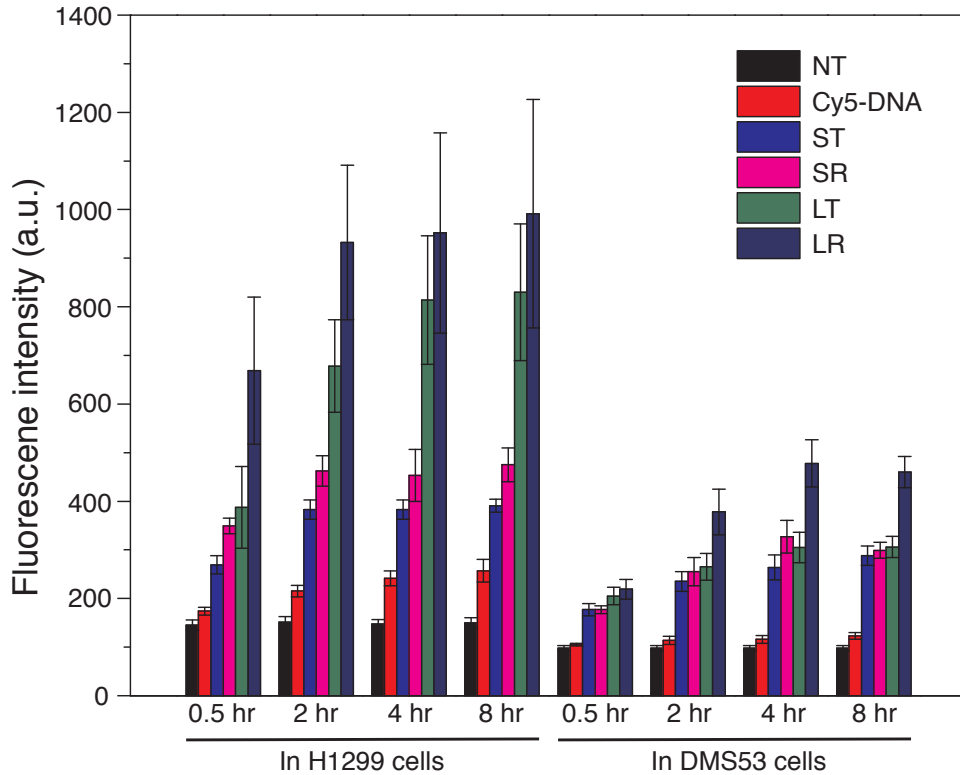

Figure S12. Median fluorescence intensity derived from flow cytometry of H1299 and DMS53 cells after 0.5, 2, 4, and 8 hrs incubation with DONs. Non-treated (NT) and Cy5-DNA treated cells were included as negative controls. Each column represents the average fluorescence intensity of cells from three independent experiments. Error bars represent standard deviations. Same trend was observed as shown in Figure 3a.

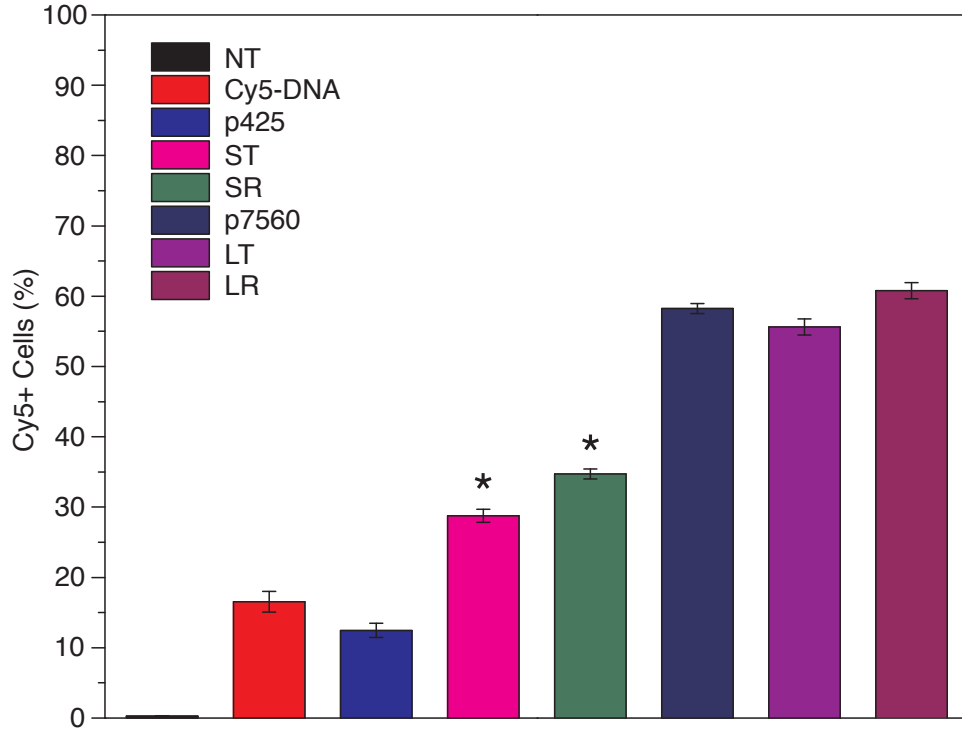

Figure S13. DONs uptake into H1299 cells after 4 hours of incubation. p425 and p7560 scaffolds were included for comparison. Cy5-DNA concentration was set at 250 nM. ST and SR had higher uptake efficiency than p425 ( $*P < 0.05$ ), while p7560 exhibited similarly high cell uptake as LT and LR, which may attribute to its long and circular nature that formed randomly coiled 3D structures of potent cellular uptake capability.

Table S2. Statistical analysis of cellular uptake of DONs in H1299 and DMS53 cells.

| Pairwise comparison | In H1299 Cell |     |     |     | In DMS53 Cell |     |     |     | H1299 Cell vs DMS53 Cell                                                                                                       |       |     |     |     |
|---------------------|---------------|-----|-----|-----|---------------|-----|-----|-----|--------------------------------------------------------------------------------------------------------------------------------|-------|-----|-----|-----|
|                     | 0.5 H         | 2 H | 4 H | 8 H | 0.5 H         | 2 H | 4 H | 8 H |                                                                                                                                | 0.5 H | 2 H | 4 H | 8 H |
| ST vs NT            | *             | *   | *   | *   | *             | *   | *   | *   | ST                                                                                                                             | *     | *   | *   | *   |
| ST vs Cy5-DNA       | *             | *   | *   | *   | *             | *   | *   | *   | SR                                                                                                                             | *     | *   | *   | *   |
| ST vs SR            | *             | *   | NS  | NS  | *             | NS  | *   | *   | LT                                                                                                                             | *     | *   | *   | *   |
| ST vs LT            | *             | *   | *   | *   | *             | *   | *   | *   | LR                                                                                                                             | *     | *   | *   | *   |
| ST vs LR            | *             | *   | *   | *   | *             | *   | *   | *   | Cy5-DNA                                                                                                                        | NS    | NS  | NS  | NS  |
| SR vs NT            | *             | *   | *   | *   | *             | *   | *   | *   | NT                                                                                                                             | NS    | NS  | NS  | NS  |
| SR vs Cy5-DNA       | *             | *   | *   | *   | *             | *   | *   | *   | * Indicates the difference between this pair are statistically significant with P<0.05<br><br>NS=Non statistically significant |       |     |     |     |
| SR vs LT            | NS            | *   | *   | *   | *             | NS  | *   | *   |                                                                                                                                |       |     |     |     |
| SR vs LR            | *             | *   | *   | *   | *             | *   | *   | *   |                                                                                                                                |       |     |     |     |
| LT vs NT            | *             | *   | *   | *   | *             | *   | *   | *   |                                                                                                                                |       |     |     |     |
| LT vs Cy5-DNA       | *             | *   | *   | *   | *             | *   | *   | *   |                                                                                                                                |       |     |     |     |
| LT vs LR            | *             | *   | NS  | NS  | *             | *   | *   | *   |                                                                                                                                |       |     |     |     |
| LR vs NT            | *             | *   | *   | *   | *             | *   | *   | *   |                                                                                                                                |       |     |     |     |
| LR vs Cy5-DNA       | *             | *   | *   | *   | *             | *   | *   | *   |                                                                                                                                |       |     |     |     |
| Cy5-DNA vs NT       | NS            | NS  | NS  | NS  | *             | NS  | *   | *   |                                                                                                                                |       |     |     |     |

Note: Statistical analysis is based on the flow cytometry data shown in Figure 3a.

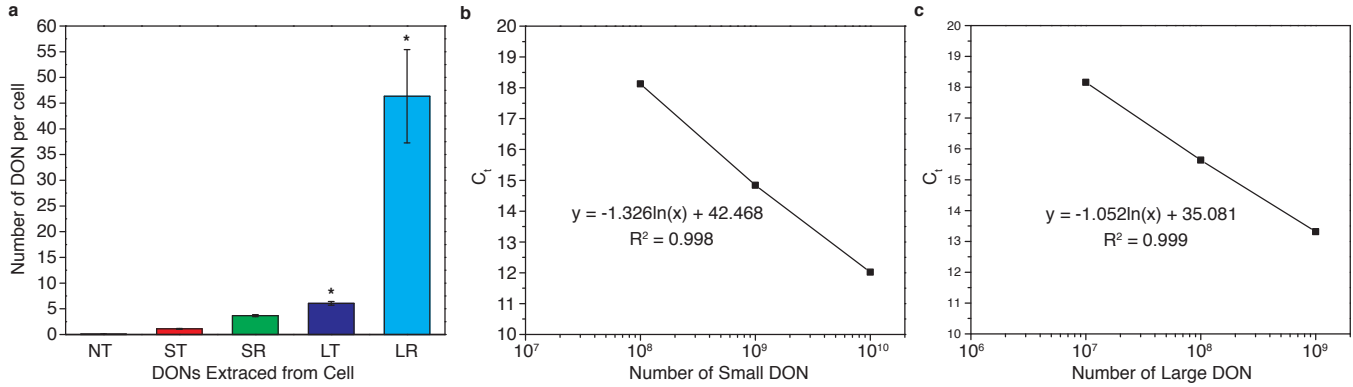

Figure S14. Quantitative PCR quantification of DONs uptake into H1299 cells after 4 hours of incubation. **a**. Number of DONs per cell derived from qPCR. LT and LR exhibited significantly higher number of DONs per cell than ST and SR (\* $P < 0.05$ ). And rod-shaped DONs had higher uptake than tetrahedron-shaped DONs of similar size. **b**. Standard curve for small DONs. **c**. Standard curve for large DONs. Note that the absolute number of DONs per cell from qPCR was underestimated because significant loss of DONs may happen prior to PCR amplification, such as intracellular nuclease degradation, loss during cellular DNA extraction, loss during ethanol precipitation. And the loss was theoretically more severe for small DONs given p425 scaffold DNA's higher vulnerability to nuclease digestion and lower ethanol precipitation efficiency (since it is shorter and linear).

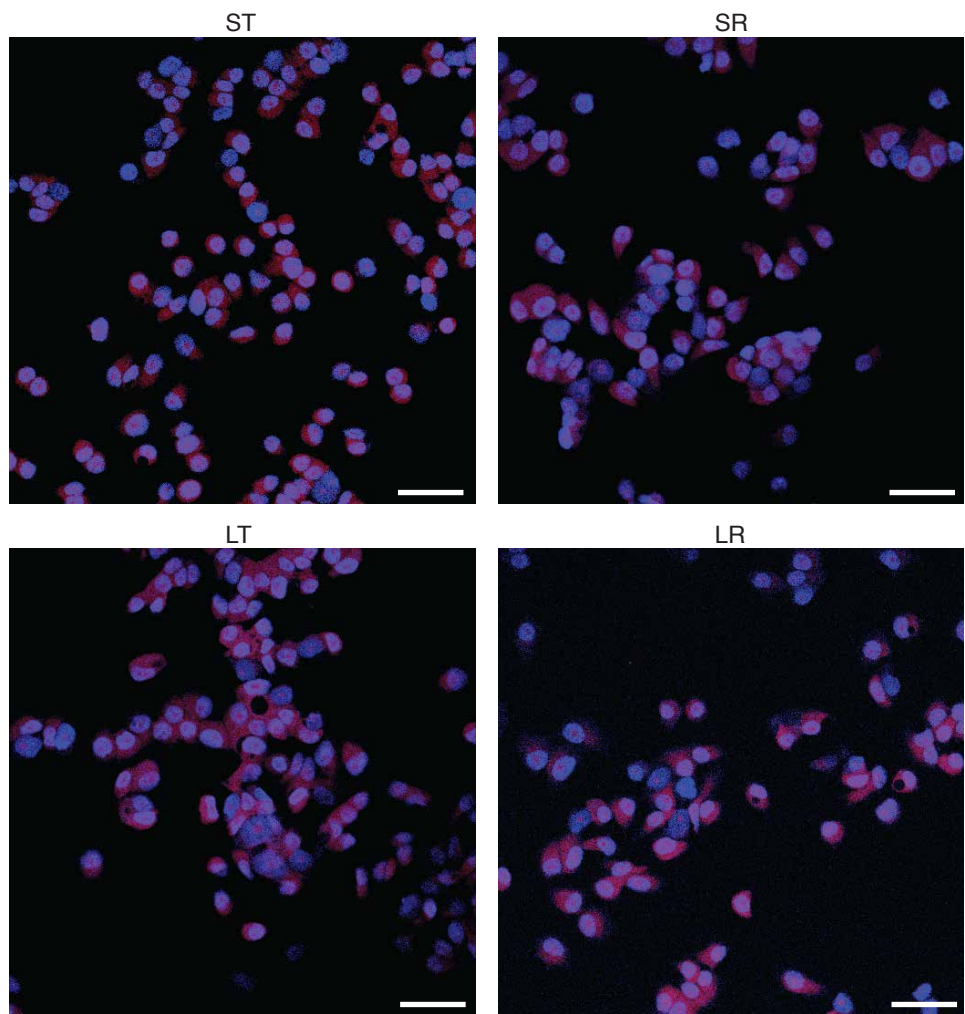

Figure S15. Cellular uptake of DONs in DMS53 cells after 8 hours of incubation studied by confocal. Blue: DAPI, red: Cy5. Scale bars: 25 μm.

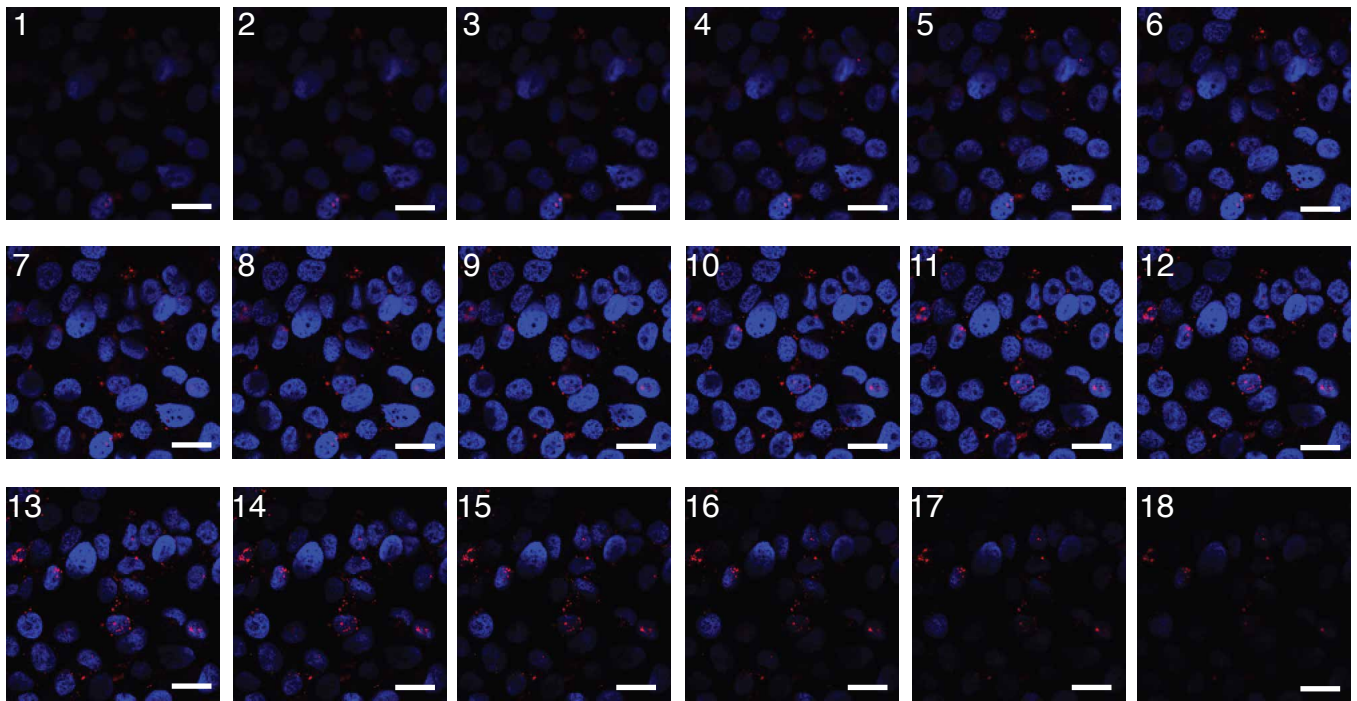

Figure S16. Continuous z-sections of confocal images of ST-Cy5 in H1299 cells with 8 hours of incubation. Blue: DAPI, red: Cy5. Scale bars: 25  $\mu$ m.

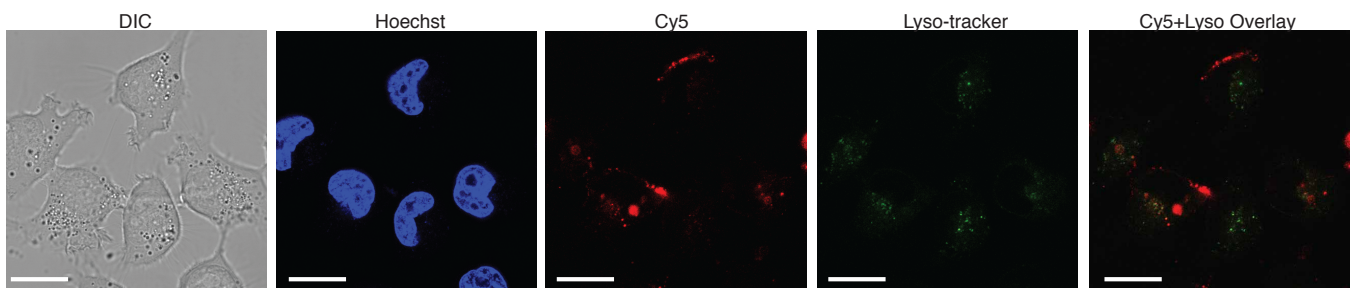

Figure S17. Intracellular co-localization study of SR-Cy5 with lysosome in H1299 cells. Cy5 fluorescence partially co-localize with lysosome. Scale bars: 25  $\mu$ m.



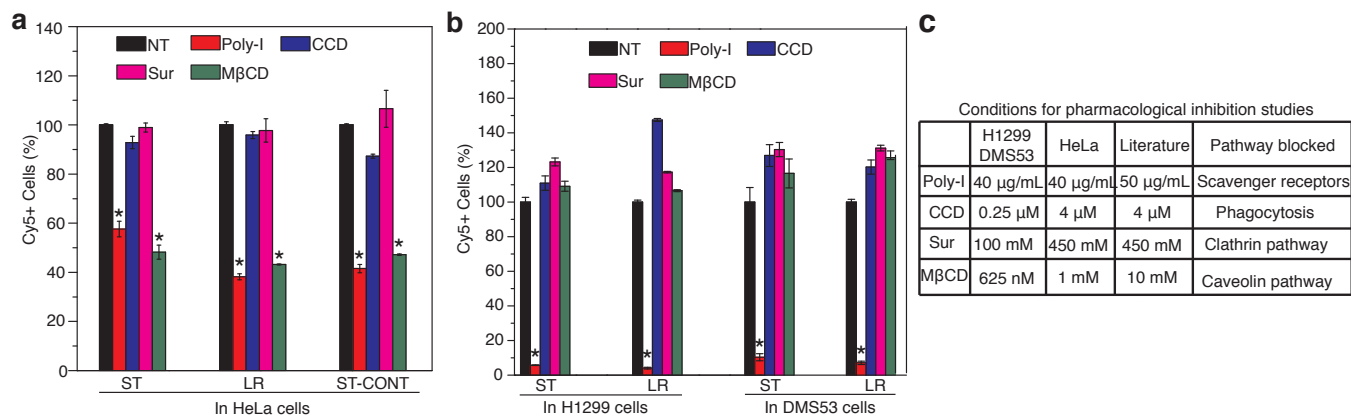

Figure S18. Pharmacological inhibition study of DONs-Cy5 in cancer cells. **a.** Pathway study of ST, LR, and ST-CONT in HeLa cells. **b.** Pathway study of ST, LR, and ST-CONT in H1299 and DMS53 cells. **c.** Conditions used for pharmacological inhibition study. All columns represent mean±standard deviation from three independent experiments. \* $P < 0.05$  compared with NT. Noted that percentage of Cy5+ cells was normalized based on NT which was set at 100%.

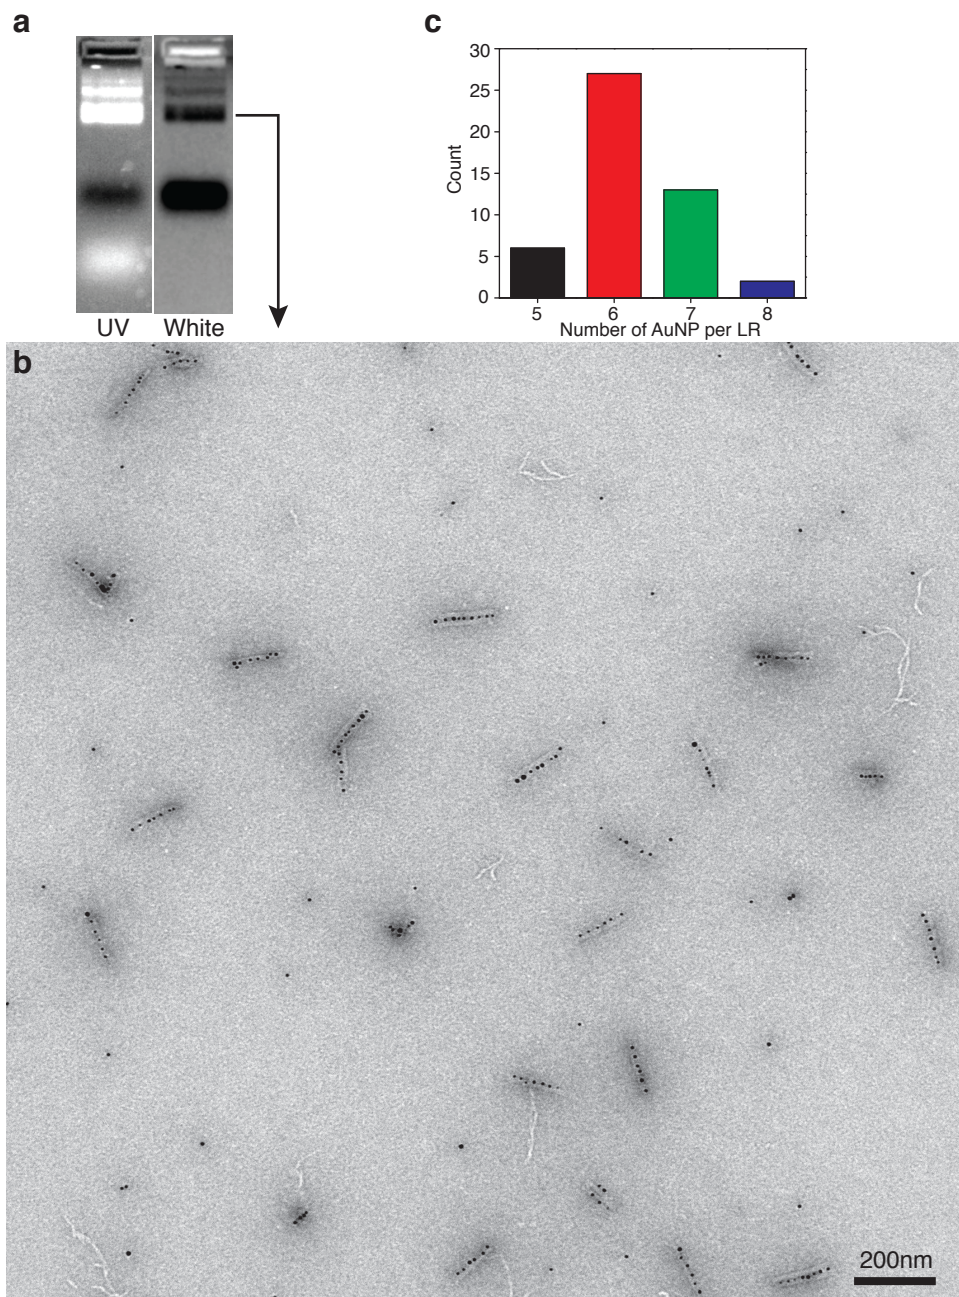

Figure S19. Barcoding AuNPs onto LR. **a.** Native agarose gel electrophoresis. **b.** Low-magnification TEM image of LR barcoded with AuNPs. **c.** Statistical distribution of AuNP numbers tagged onto LR.



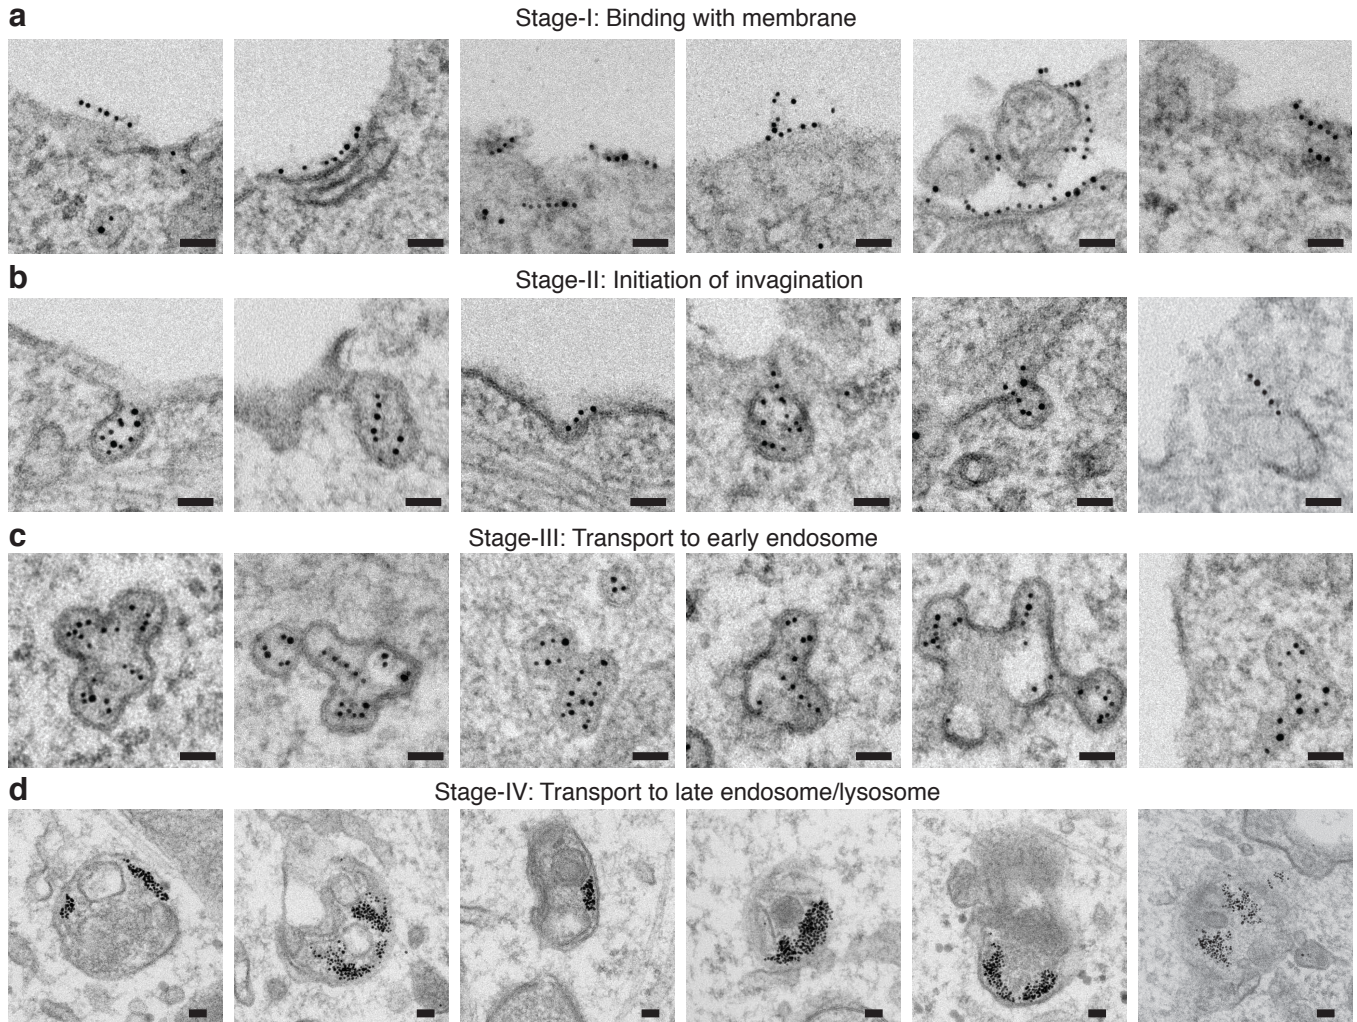

Figure S20. Additional representative TEM images of each internalization stage of LRs in H1299 cells. Scale bars: 50 nm.



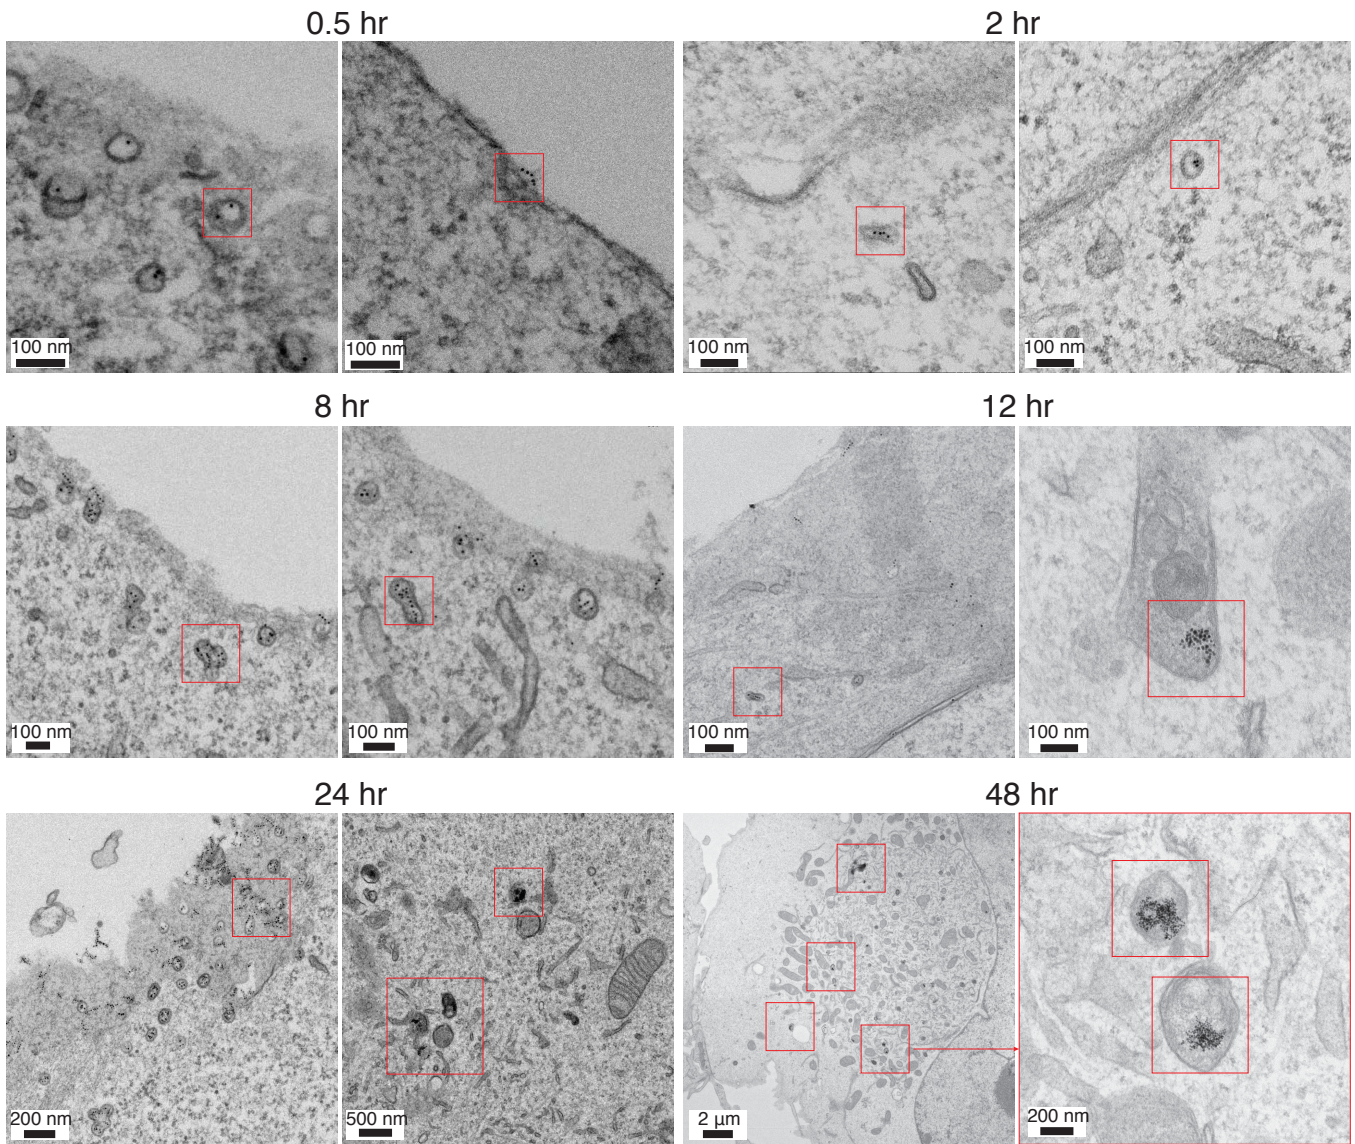

Figure S21. Representative TEM images of barcoded LR in H1299 cells at varied time points.

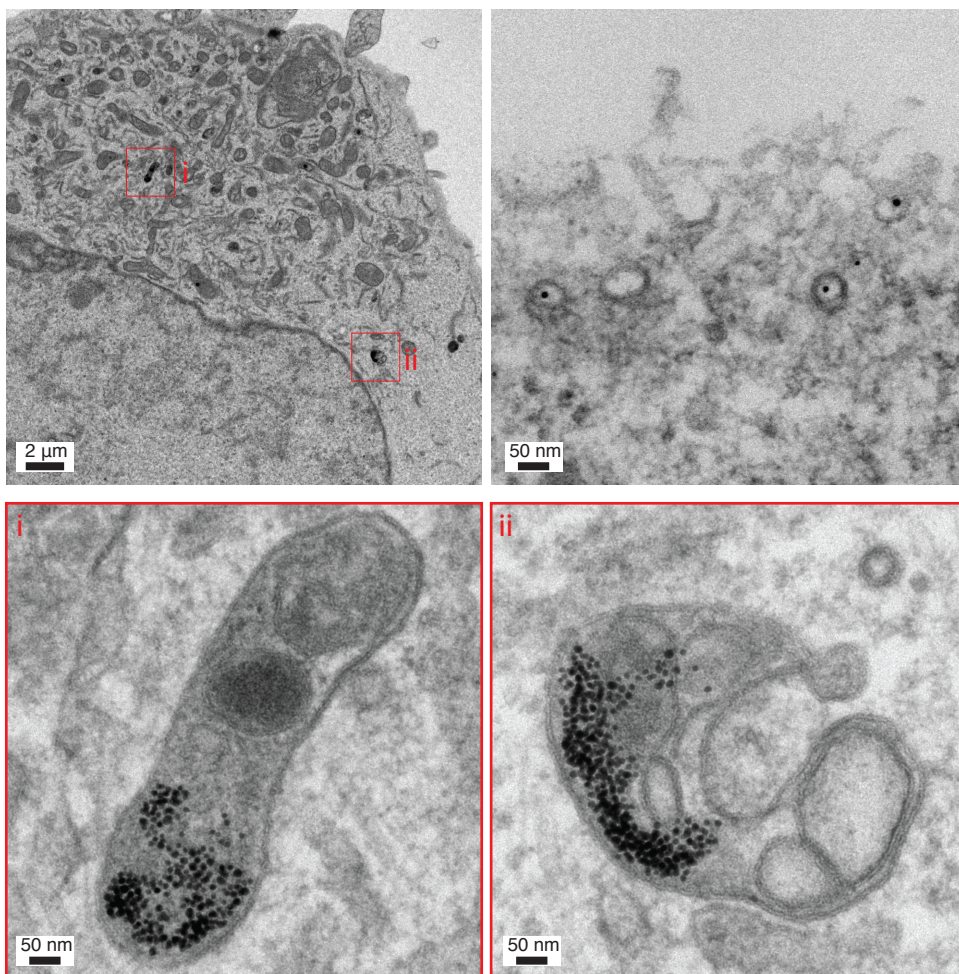

Figure S22. TEM study of free AuNP's internalization in H1299 cells.

## References

1. Douglas, S. M.; Chou, J. J.; Shih, W. M. *Proc Natl Acad Sci USA*. **2007**, *104* (16), 6644-6648.
2. Wang, P.; Gaitanaros, S.; Lee, S.; Bathe, M.; Shih, W. M.; Ke, Y. *J Am Chem Soc* **2016**, *138* (24), 7733-7740.
3. Okholm, A. H.; Nielsen, J. S.; Vinther, M.; Sorensen, R. S.; Schaffert, D.; Kjems, J. *Methods* **2014**, *67* (2), 193-197.

Section 3. DNA Strands Sequences

p7560:

AGCTTGGCACTGGCCGTCGTTTTACAACGTCGTGACTGGGAAAAACCCGTCGTTACCCAACCTTAATCGCCTGCAGCACATCCCCCTTTCGCCAGCTGG  
CGTAATAGCGAAGAGGCCCGCCAGCTGCCCTTCCCAACGATTTGCCGAGCTGAATGGCGAATGGCGCTTTGCCTGGTTCCGGCAGCAGAAAGCGGT  
GCCGGAAGCTGGCTGGAGTCCGATCTTCCGAGGCCAGTCTGCGTCCCTCAAACGGCAGATGCACGGTTCAGATGCCCCATACACCA  
ACGTGACCTATCCCATACGGTCAATCCGCGCTTTGTTCCACCGGAAATCCGACGGGTTGTTACTCGCTCACATTAATGTTGATGAAAGCTGGCTACA  
GGAAGGCCAGCAGCGCAATTTTTGATGGCGCTTCTATTGGTTAAAAAATGAGCTGATTAACAAAAATTTAATGCGAATTTAAACAAAAATTAACGTTTAC  
AATTTAAATATTTGCTTATACAACTTCTCTGTTTTGGGGCTTTCTGATTATCAACGGGGTACATATGATGACATGCTAGTTTACGATTACCGTTTACCG  
ATTTCTGTTTTGCTCCAGACTCAGGCAATGACCTGATAGCCTTTGATGATCTCAAAAATAGTACCCTCTCCGGCATTAAATTTATCAGCTAGAACCG  
TTGAATATCATATGATGGTGAATGACTGTCTCCGGCTTTCTCACCTTTTGAATCTTACCTACACATTAAGCTCAGGCAATGCATTTAAAAATATGAGGGT  
TCTAAAAATTTTATCCTTGCCTGTAATAAAGGCTTCTCCCGAAAAAGTATTACAGGGTCAATATGTTTTGGTACAACCGATTAGCTTTATGCTGTGAGG  
CTTTATTGCTTAATTTTGTAAATCTTTCGCTTGCCTGTATGATTTATGGATGTTAATGCTACTACTATTAGTGAATTTGATGCCACCTTTTACGCTCGCGCC  
CCAAATGAAAAATATAGCTAAACAGGTTATTGACCATTTGCGAAATGATCTAATGGTCAAACAAAATCTACTCGTTCCGAGAATGGGAATCAACTGTTATATG  
GAATGAACTCCAGACACCGTACTTTAGTTGCATATTAACAAATGTTGAGTACAGCATTATATTAGCAATTAAGCTCTAAGCCATCCGCAAAAAATGACC  
TCTTATCAAAGGAGCAATTAAGGTACTCTAATCCTGACCTGTGGAGTTTGGCTCCGGCTCGGTTGAGGCTTGAAGCTCGAATTAACACCGGATATTTG  
AAGTCTTTCGGGCTTCTCTAATCTTTTGTAGCAATCCGCTTTGCTTCTGACTATAATAGTACGGGTAAGACCTGATTTTGTATTATGGTCATTCTCGT  
TTTCTGAATCTTTAAAGCAATTTGAGGGGATTCAATGAATTTATGACATTTCCGACGATTCCGACGATTGGACGCTATCCAGCTAAACATTTACTATCCCCCTC  
TGGCAAACTCTTTTGCAAAAGCCTCTCGCTATTTGGTTTTTATCGTCGTCGGTAAACGAGGGTTATGATGTTGCTTCTACTATGCTTCCGCTGATTAATC  
CTTTTGGCGTTATGATCTGCATTAGTTGAATGTGGTATTCCATAACTCTCAACTGATGAATCTTTTACCTGTAATAATGTTTTCGCTTAGTTGCTTTATTA  
CGTAGATTTTTCTCCCAACGCTGACTGGTATAATGAGCCAGTCTTAAATGAGGTAATTAAGGTAATTCACAATGATTAAGCTTGAATTAACCCATCTCAAG  
CCCAATTTACTACTCGTCTGGTGTCTCTGTCAGGGCAAGCCTTATCTACTGAATGAGCAGCTTTGTTACGTTGATTTGGGTAATGAATATCCGGTCTTCTG  
TCAAGATTACTCTGTAAGGTCAGCCAGCCTATGCCCTTGGTCTGACTGACCTGTCCTCTTTCAAAGTTGGTCAATTTCCCTTATGATTTGCTTATGAT  
GACCGCTCGCGCTCGTCCGGCTAAGTAACTGGAGCAGGTCGCGGATTTGACACAAATTTATCAGCGATGATACAAATCTCCGTTGACTTTGTTTT  
CGCCTTGGTATAATCGCTGGGGTCAAAGATGAGTGTTTAGTGTATCTTTTGCCTCTTTCGTTTAGGTTGGTGCCTTCGTAGTGGCATTACGATTTTA  
CCGTTTTAATGGAACTTCTCATGAAAAAGTCTTTAGTGCCTCAAAGCCTCTGAGCCGTTGCTACCCCTCGTCCGATGCTGCTTTCCGCTGAGGGT  
GAGCATCCCGCAAAGCGGCCCTTAACTCCCTGCAAGCCTCAGCGACCGAATATCTCGTTATCGTGGCGGATGGTTTGTGATGTCGGCGCAACT  
ATCGGTACAAGCTGTTAAGAAATCACCTCGAAAGCAAGCTGATAAACCAGTACAATAAAGGCTCCTTTTGGAGCCTTTTTCGAGCCTTTTCAACGT  
GAAAAATATATTTCCGAATTCCTTTAGTTGTTCTTCTATTCTACTCCGCTGAACTGTTGAAAGTTGTTTAGCAAAATCCCATACAGAAAAATCATTTA  
CTACGCTGGAAGACGACAAAACCTTAGATCGTTACGCTAAGTACGCTGCTGTGGAATGCTACAGGCTGTAGTTTGTACTGGTACGAAAC  
TCAGTGTACGGTACATGGTTCCTATTGGGCTTGCATCCCTGAAAATGAGGGTGGTGGCTGAGGGTGGCCGTTCTGAGGGTGGCCGTTCTGAGG  
GTGGCGGTACTAAACCTCCTGAGTACGGTGTACACCTATTTCCGGGCTATACTTATCAACCCCTCTCGACGGCACTTATCCGCTGTGACTGAGCAAAAC  
CCGCTAATCCTAATCCTTCTGAGGAGTCTCAGCCTCTTAATCTTCACTGTTTCAAGATAATAGGTTCCGAAATAGCCAGGGGCACTTAACTCTTATATA  
CGGCACTGTACTCAAGGCATGACCCGTTAAACCTTATACGACTACCTGATCATCAAAGCCATGATGACGCTTACTGGAACGGTAAATTT  
AGAGACTGCGCTTTTCTGCTTGGCGCTGTAACCATGATTTTGTGTAATCTCAAGGCCAATCGTCTGACCTGCCTCAACCTGCTCAATGCTGGCGG  
CGGCTCGGTGGTGGTCTGTTGGCGGCTCTGAGGGTGGTGGCTCTGAGGGTGGCGGTTCTGAGGGTGGCGGCTCTGAGGGAGGCGGTTCCGGTG  
GTGGCTCGGTCCGGTGAATTTGATTATGAAAGATGGCAACCGCTAATAAGGGGGCTATGACCGAAAATGCCGATGAAAACCGCTACAGCTGACGCT  
TAAAGGCAAACTGATTCTGCGCTACTGATTACGGTCTGCTATCGATTGGTTTCAATGGTACGCTTTCCGCGCTTCTGCTAATGGTAATGGTCTGAGG  
ATTTTGTGGCTCAATCCCAATGGCTCAAGTCCGGTACGGTGAATTTACCTTAAATGAATAATTTCCGCTCAATTTACCTTCCCTCCCTCAATCGGT  
GTAATGTCGCGCTTTTGTCTTTGGCGCTGTAACCATGATTTTCTATTGATTGGTGTGCAAAAATAAACTTATTCGCTGGTCTTTGCTTTTATATG  
TTGCCACCTTATGATGATTTTCTACGTTTGTCAACATACTGCTAATAAGGATCTTAATCATGCCAGTCTTTTGGTATTCCGTTATTTGCTTTCC  
TCGGTTCCCTTCTGGTAACTTTGTTCCGGCTATCTGCTTACTTTCTAAAAAGGGCTTCGGTAAGATAGCTATGCTATTCATTGTTCTTCTGCTTATTA  
AATTTTTGTTTTCTGATGTTTTGTTTCACTCTCTGATATAGCGCTCAATTACCTCTGACTTTGTTTCAAGGGTTCAGTTAATCTCCCGCTCAATGCCCT  
CCCTGTTTTTATGTTATCTCTGCTGTAAGGCTGCTATTTTCAATTTTGGACGTAAACAAAAAATCGTTTCTTATTTGGATTGGGATAAATAATAGGCTGTTA  
TTTTGTAAGTGGCAAAATAGGCTCTGGAAGACGCTCGTTAGCCTTGGTAAGATTCAAGATAAATTTAGCTGGGTGCAAAATAGCAAACTAATCTTGATTT  
AAGGCTTCAAACCTCCCGCAAGTCCGGAGGTTGCTGTAACCGCTCGCTGTTTCAAGTAACCGGATAAGCCTTCTATATCTGATTTGCTGCTATTTGGG  
CCGTAATGATTTCCACTCAAGATAAACCAGGCTGCTGTTCTCATGATGATGCGGTACTTGGTTAATAACCCGTTCTGGAATGAAGAAGACAG  
CCGATTATTGATTGGTTTCTACATGCTCGTAAATTAGGATGGGATATTATTTCTTGTTCAGGACTTATCTATTGTTGATAAACAGGCGGTTCTGCTAGG  
TGAACATGTTGTTTATGTCGTCGTCGACAGAACTACTTTACCTTTTCCGGTACTTTATATCTCTTATACTGGCTGAAAATGCCCTGCCATAAATAC  
ATGTTGGCGTGTGTAAGTATGGCGATTCTCAATTAAGCCCTACTGTTGAGCCTTTATACTGGTAAGAATTTGATAACCGCATATGACTACCAACAGGC  
TTTTTCTAGTAATATGATTTCCGGTGTATTCTTATTTAAGCCTTATTTATCACAGGTCGTTATTTCAAACCATTAATTTAGGTCAGAAAGTAAATTAAC  
TAAATATATTTGAAAAGTTTTCTCGCTTTTCTGCTGATTTGGATTGTCATCAGCATTTACATATAGTTATATAACCCCAACCTAAGCCGGAGGTTAAAA  
AGGTAGTCTCTCAGACCTATGATTTGATAAATCCTATTGACTCTTCTCAGCGCTTAATCTAAGCTATCGCTATGTTTCAAGGATTTCAAGGAAAAATTA  
ATTAATAGCGAGATTTACAGAAGCAAGGTTATTCACCTACATATATTGATTTATGACTGTTTCCATTA AAAAAGGTAATCAAATGAAATGTTAAATGTAAT  
AATTTTTGTTTTCTGATGTTTTGTTTCACTCTCTTTGCTCAGGTAATGAAATGAATAATCGCCTCTGCGGATTTGTAACCTGGATTCAAAGCAATC  
AGCGCAATCCGTTATGTTTTCTCCCGATGTAAGGTTACTGTTACTGATATCATCTGACGTTAAACCTGAAAATCTACGCAATTTCTTATTTCTGTTTTAC  
GTGCAATAATTTTATGATAGGTTAGGTTCAACCTTCCATTATTAGAAATATAATCCAAACAATCAGGATTATATTGATGAATGCCATCTGATAATCAGG  
AATATGATGATAATCCGCTCCTCTGGTGGTCTTTGTTCCGCAAAATGATAATGTTACTCAAACCTTTAAAAATTAATAACGTTCCGGCAAGGATTAATA  
CGAGTTGTCGAATGTTTGAAGTCTAATACTTAACTCTCAAATCTCAATGATTTACTATTGACGGCTTAATCTATTAGTTGTTAGTCTCTAAAGATTTTTA  
GATAACCTTCCCTAATCTCTTCAACTGTGATTTGCCAACTGACAGATATTGATTGAGGGTTGATATTGAGGTTACGCAAGGTGATGCTTTAGTTTTT  
CATTTGCTGCTGGCTCTCAGCGTGGCACTGTTGACAGGCGGTGTTAATACTGACCCGCTCACTCTGTTTTATCTTCTGCTGGTGGTTCGTTCCGATTTTT  
AATGGCGATGTTTTAGGGCTACTGATTCGCGCATTAAGACTAATAGCCATTA AAAAATATTGCTGTGCCAGTATTCTTACGCTTTCAAGTCAAGAGGTT  
TCTACTCTGTTGGCCAGAACTCCCTTTTACTGCTGCTGACTGGTGAATCTGCCAATGTAATAATCCATTTACAGCAATGACGCTCAAAATGTA  
GGTATTTCCATGAGCCTTTTCTGCTGCTGCTGGCGGTAATATTGTTCTGGATATTACAGCAAGGCGGATAGTTTGGTTCTTACTCAGGCAAGT  
GATGTTATTAATAAAGAAATGATGCTACAACGGTAAATTTGCGTGTGACAGACTCTTTACTCGGTGGCTCACTGATTATAAAAACACTTCTCAGG  
ATTTCTGGCGTACCGTCTCTGCTAAATCCCTTAAATCGGCTCCTGTTTAGCTCCCGCTCTGATTTAACAGGAAAGACAGTTATACGCTGCTGCTCAAA  
GCAACCATAGTACGCGCCTGTAGCGGCGCATTAAGCGCGCGGGTGGTGGTTACCGCAGCGTGACCGCTACACTTGGCAGCGCCCTAGCGCCC  
GCTCCTTTCCGCTTTCTTCCCTTCTCTGCGCACGTTCCGCGGCTTTCCCGCTCAAGCTTAAATCGGGGGCTCCCTTTAGGTTCCGATTAGTGCTT  
TACGGCACTCGACCCCAAAAAACTGATTTGGGTGATGTTTACGTAAGTGGGCTAGTGGGCTCGCCCTGATAGACGTTTTTCCGCTTTGACGTTGGAGTCCA  
CGTTCTTAAATAGTGGACTCTGTTCCAAACTGGAACAACACTCAACCTTATCTCGGGCTATCTTTGATTTAAGAGGATTTGCGGATTTCCGAACCCAC  
CATCAACAGGATTTTCCGCTGCTGGGCAACACGCTGGACCGCTTCTGCAACTCTCAGGGCCAGGCGGTGAAGGGCAATCAGCTGTTGCC  
GTCTCACTGGTGA AAAAGAAAAACCCCTGGCGCCAATACGCAACCCGCTCTCCCGCGGTTGGCCGATTAATGATGAGCTGGCACGACAGGT  
TTCCCGACTGGAAGCGGGCAGTGAGCGCAACGCAATTAATGTAGTTAGCTCACTATTAGGCAACCCAGGCTTTACACTTTATGCTTCCGGCTCGTAT  
GTTGTGTGAAATGTGAGCGGATAACAATTTACACAGGAAACAGCTATGACCATGATTACGAAATCGAGCTCGGTACCCGGGATCCCGCTCTTTATC  
GAGGTAACAAGCACCCAGCTAGCTTAAAGCCTGTTTACTCATACACAGCAGGAGGTGAGGTTCCGAGAAATGATTTATGAAATGGCTCAGCCGAT  
TCAAGGCCCTTATTTGTTCCGCGGACGATTGCTTACAGATTGGCAGGCGGCACTGTCGGTATCATAGACTCACTCCAGGCGGAGCTAAATAGAT  
TAGAAGCGGGTATTTTGGCGGACATTGTCATAAGGTTGACAATTCAGCACTAAGGACACTTAAAGTCTGCGCATGAATTCACAACCACTTAGAAGAA  
CATCCACCTTGGCTTCTCTGAGAA



p425:  
 GTATTCTTACGCTTTCAGGTGAGAAGGGTTCTATCTCTGTTGGCCAGAATGTCCCTTTTACTGCTGCTGACTGGTGAATCTGCCAATGTAAA  
 TAATCCATTTGAGCAGGATTGAGCGTCAAAATGATAGGATTTCCATGAGCGTTTTTCCTGTTGCAATGGCTGGCGGTAATATTGTTCTGGATATTACCA  
 GCAAGGCCGATAGTTTGTAGTTCTTACTCAGGCAAGTATGTTACTAATCAAGAAGTATTGCTACAACGGTTAATTTGCGTGATGGACAGAC  
 TCTTTTACTCGGTGGCCTCACTGATTATAAAAACACTTCTCAGGATTCTGGCGTACCGTTCTGTCTAAAATCCCTTTAATCGGCCTCCTGTTTAGC  
 TCCCGCTCTGATTCTAACGAGGAAAGCACGTTATAC

Helper strands for p425 preparation  
 Helper\_p425-1 GTAAGAATACGTGGCACAGA  
 Helper\_p425-2 TGACGAGCACGTATAACGTG

Cy5-DNA: ACACACACACACA-Cy5  
 Alexa488-DNA: ACACACACACACA-Alexa488

**DNA Strands of Small Tetrahedron (ST)**

| Name       | Sequence                                                               | Note        |
|------------|------------------------------------------------------------------------|-------------|
| ST-Fluo-1  | TGTGTGTGTGTGT GTCTGAAATGGATTATTAATATCCAGAACAAT TGTGTGTGTGTGT           | Fluo handle |
| ST-Fluo-2  | TGTGTGTGTGTGT TCATGGAAATACCTACATTTTGAGATAGAACCCTTCTGACCT TGTGTGTGTGTGT | Fluo handle |
| ST-Fluo-3  | TGTGTGTGTGTGT TCTGGCCAACAGACGCTCAATC TGTGTGTGTGTGT                     | Fluo handle |
| ST-Fluo-4  | TGTGTGTGTGTGT ATTACCGCCAGTTGATTAGTAA TGTGTGTGTGTGT                     | Fluo handle |
| ST-Fluo-5  | TGTGTGTGTGTGT AACCGTTGTAGCAATACTTCCATTGCAACAGGAAAAACGCTGTGTGTGTGT      | Fluo handle |
| ST-Fluo-6  | TGTGTGTGTGTGT CTATCGCCCTTCTGGTTACATTGGCAGATTC TGTGTGTGTGTGT            | Fluo handle |
| ST-Fluo-7  | TGTGTGTGTGTGT CCTGAGAAGTGTTTTTAGTAGAAGAACTCAAA TGTGTGTGTGTGT           | Fluo handle |
| ST-Fluo-8  | TGTGTGTGTGTGT ACCAGTCACACGACCAACCGGTACGCCAGAAT TGTGTGTGTGTGT           | Fluo handle |
| ST-Fluo-9  | TGTGTGTGTGTGT AGGGATTTTAGACAGGGTAATAAAAGGGACAT TGTGTGTGTGTGT           | Fluo handle |
| ST-Fluo-10 | TGTGTGTGTGTGT CCGAGTAAAAGAGTCTGTCCAATACACAGGAGGCCGATTAA TGTGTGTGTGTGT  | Fluo handle |
| ST-Fluo-11 | TGTGTGTGTGTGT GAAAGCGTAAGTCACGCAAATT TGTGTGTGTGTGT                     | Fluo handle |
| ST-Fluo-12 | TGTGTGTGTGTGT TAACATCACTTGCTGATAATCAGTGAGGCCA TGTGTGTGTGTGT            | Fluo handle |

**DNA Strands of Small Tetrahedron Control (ST-CONT)**

| Name           | Sequence                                                              | Note        |
|----------------|-----------------------------------------------------------------------|-------------|
| ST-CONT-Fluo-1 | TGTGTGTGTGTGT ACATTCCTAAGTCTGAAACATTACAGCTTGCTACACGAGAAGAGCCGCCATAGTA | Fluo handle |
| ST-CONT-Fluo-2 | TGTGTGTGTGTGT ATCACCAGGCAGTTGACAGTGTAGCAAGCTGTAATAGATGCGAGGGTCCA ATAC | Fluo handle |
| ST-CONT-Fluo-3 | TGTGTGTGTGTGT TCAACTGCCTGGTGATAAAACGACACTACGTGGGAATCTACTATGGCGCTCTTC  | Fluo handle |
| ST-CONT-Fluo-4 | TGTGTGTGTGTGT TTCAGACTTAGGAATGTCTTCCCAGTAGTGTGTTGTATTGGACCTCGCAT      | Fluo handle |

**DNA Strands of Small Rod (SR)**

| Name       | Sequence                                                           | Note        |
|------------|--------------------------------------------------------------------|-------------|
| SR-Fluo-1  | TGTGTGTGTGTGT ACTTGCCTTTGCTGGTGACCTGAAAGCGTAAG TGTGTGTGTGTGT       | Fluo handle |
| SR-Fluo-2  | TGTGTGTGTGTGT GTAGCAATAGCCATTGGACATTCTGGCCAACA TGTGTGTGTGTGT       | Fluo handle |
| SR-Fluo-3  | TGTGTGTGTGTGT AAAGAGTCTACCTACAGATTACCAGTCACAC TGTGTGTGTGTGT        | Fluo handle |
| SR-Fluo-4  | TGTGTGTGTGTGT TACGCCAGAATCCTGACATTGGCATTGACGCTCAATCG TGTGTGTGTGTGT | Fluo handle |
| SR-Fluo-5  | TGTGTGTGTGTGT CCTCGTTAGAATCAGAACCCTTCAATATCCA TGTGTGTGTGTGT        | Fluo handle |
| SR-Fluo-6  | TGTGTGTGTGTGT AGGCCGATTAAGGGAATAAAAGGCAACAGGA TGTGTGTGTGTGT        | Fluo handle |
| SR-Fluo-7  | TGTGTGTGTGTGT GTGAGGCCACCGAGTA TGTGTGTGTGTGT                       | Fluo handle |
| SR-Fluo-8  | TGTGTGTGTGTGT TATCGGCCGAGTAGAA TGTGTGTGTGTGT                       | Fluo handle |
| SR-Fluo-9  | TGTGTGTGTGTGT GAGATAGAGCGGGAGCGATTAGTAATAACATC TGTGTGTGTGTGT       | Fluo handle |
| SR-Fluo-10 | TGTGTGTGTGTGT GACCAGTATTTAGACACGCAAATTAACCGTT TGTGTGTGTGTGT        | Fluo handle |
| SR-Fluo-11 | TGTGTGTGTGTGT AAAACGCTCATGGAATGTCCATCAGGAACGG TGTGTGTGTGTGT        | Fluo handle |
| SR-Fluo-12 | TGTGTGTGTGTGT ATTATTTAGAAGTGT TGTGTGTGTGTGT                        | Fluo handle |
| SR-Fluo-13 | TGTGTGTGTGTGT CGTGCTTT TGTGTGTGTGTGT                               | Fluo handle |
| SR-Fluo-14 | TGTGTGTGTGTGT GAACAATATTACCGCCACTTCTTTAAACAGG TGTGTGTGTGTGT        | Fluo handle |

**DNA Strands of Large Rod (LR)**

| Name      | Sequence                         | Note |
|-----------|----------------------------------|------|
| LR-Fluo-1 | CCAGACGAGGAATCATGCTGTCTTAAGAGCAA | core |
| LR-Fluo-2 | CGACAAAACATCGGGAGACGCTGAGAAGAGTC | core |
| LR-Fluo-3 | GCGCATACTATTTGCATATACAGTCTTACCG  | core |
| LR-Fluo-4 | TTATGAATTGCTTATGATCCTTGAAAACATAG | core |
| LR-Fluo-5 | ATTAGTCTCGTATTGGTCAAGAAGATAGCC   | core |
| LR-Fluo-6 | CACAGACACGCCATTAGTTGTAGCAATCTTC  | core |
| LR-Fluo-7 | ATACGTGGCTGAGAGCACCACCAGGAGGAAAC | core |

|            |                                                 |                    |
|------------|-------------------------------------------------|--------------------|
| LR-Fluo-8  | ACGCGCGGGTTGCGCTGTAAAAGAGTCTGTCC                | core               |
| LR-Fluo-9  | ATCGGCCAGTGTGAAAAGCCTGGGGAACCTGGC               | core               |
| LR-Fluo-10 | GATTCGTGACCTGTCTACGTCAAAGGGCGAAA                | core               |
| LR-Fluo-11 | ACCCGTGCAAAATCGACAGTCATGTATGTTA                 | core               |
| LR-Fluo-12 | AACATTAACCGTAATGAGTCAAATCACCATCA                | core               |
| LR-Fluo-13 | CTTTCATCAGCTTCCAAACCGTCAAGGTGGC                 | core               |
| LR-Fluo-14 | CGCGTCTGTTGAGCTAAAGATTCAAAGGGT                  | core               |
| LR-Fluo-15 | ATATAATTCCTCAAAGACTTCAAACACCGGA                 | core               |
| LR-Fluo-16 | GATGGCTTAACTCCAATTTAAATGCAATGCC                 | core               |
| LR-Fluo-17 | TTTTTGCGGAATGACCTTGCATCATAGAAAAT                | core               |
| LR-Fluo-18 | AGCGCTCCTAATTGATGCAAGGATAAAAAATTT               | core               |
| LR-Fluo-19 | TGACCCCCCTTACTTCATGTGACACAAAAGG                 | core               |
| LR-Fluo-20 | AGAATACAAACGGAGACTTAAACAGCTTGATA                | core               |
| LR-Fluo-21 | GAGGCAAAAATCATAATGATAAATGGAAGGTA                | core               |
| LR-Fluo-22 | GATAAGTGTGCCCCCTTCGGTTTATCAGCTTG                | core               |
| LR-Fluo-23 | ACCAGGCGTCATTAAAGGGGTGAGAAGGTGAA                | core               |
| LR-Fluo-24 | AGGATTAGGAAACATGAAAAAGGCTCCAAAA                 | core               |
| LR-Fluo-25 | AGGCTTATCTACAATTTCTTACCAACGCTAAC                | core               |
| LR-Fluo-26 | GATATAGAGTAATAAGCAATTTAGGCCTGAAT                | core               |
| LR-Fluo-27 | TTAGAACCAATATAATCGGAATTATCATCATA                | core               |
| LR-Fluo-28 | TGGAAGGGCATTTCAAAAAGAAGGAATTACC                 | core               |
| LR-Fluo-29 | TATCAAATCTCTGGTTAGGAGCACTAAACAAC                | core               |
| LR-Fluo-30 | ACCTCAAAGAGATAGATTCAACCAATTTTG                  | core               |
| LR-Fluo-31 | AAATCTAAGGACTGGTACCTCATTGAGGAAGG                | core               |
| LR-Fluo-32 | TGGTCGAACGTATTGGAGTTGCAGACGCTGGT                | core               |
| LR-Fluo-33 | GTACCGAGAAGCTACGGCATTTCACATAAATC                | core               |
| LR-Fluo-34 | ATCCCCGGCCAGTGAAGGCTGATTGTTGATGG                | core               |
| LR-Fluo-35 | GAAGGGCGGCCTCTCCACGACGTTGTA AAC                 | core               |
| LR-Fluo-36 | ACTGTTGGTTTTGTTATATTAATGTCAATC                  | core               |
| LR-Fluo-37 | GCCATTCGGGGATGTGATTAAGTTGGGTAACG                | core               |
| LR-Fluo-38 | GGCAAAGCAGGAACGCAAAACCCAAAAAGTGG                | core               |
| LR-Fluo-39 | GTCATAAAACCAGACGGGAATTACGAGGCATA                | core               |
| LR-Fluo-40 | GCGGAATCACATGTTTTAGATTTATCATTGG                 | core               |
| LR-Fluo-41 | TTAGACTGGGCTTTTGCATTCAACTAATGCAG                | core               |
| LR-Fluo-42 | TAAAATGTTCTGGAAGTATAACAGAATTCATC                | core               |
| LR-Fluo-43 | CAGACCAGTGGCTGACAACAAAGCTGCTCATT                | core               |
| LR-Fluo-44 | ACGGTGTAATGCCACAAGACTTCAGCATCG                  | core               |
| LR-Fluo-45 | CCAACTTTGAGAACCACCCGCCGGATATCA                  | core               |
| LR-Fluo-46 | TCACATGAGATATAAGCCCAATAGACCGTAAC                | core               |
| LR-Fluo-47 | AGGTCAGAAGAACCGCTTCATAATCAAATCA                 | core               |
| LR-Fluo-48 | GTTGAGGCCGTA CTGAGGCCACCTACAACG                 | core               |
| LR-Fluo-49 | TGTGTGTGTGTGT AATAGTGACAAGACAAAATTCTGTTGAGCCCA  | Face-1 Fluo handle |
| LR-Fluo-50 | TGTGTGTGTGTGT CGATAGCTATCGTCGACAAAATCGAATTATT   | Face-1 Fluo handle |
| LR-Fluo-51 | TGTGTGTGTGTGT TTTGATTACACTTGCCGAATGGCTTGGCCAAC  | Face-1 Fluo handle |
| LR-Fluo-52 | TGTGTGTGTGTGT ATCACGCAGCCTTGCTGGTTAAGAAAAGCGTTG | Face-1 Fluo handle |
| LR-Fluo-53 | TGTGTGTGTGTGT AACCGTCTAGAGTCCAATTAATGATCTTTTCA  | Face-1 Fluo handle |
| LR-Fluo-54 | TGTGTGTGTGTGT ATATGATACTAGCTGAGAGTAACAGCATTAAA  | Face-1 Fluo handle |
| LR-Fluo-55 | TGTGTGTGTGTGT GAGAAAAGTATTTTTGGTAGCCAGTAACCAAT  | Face-1 Fluo handle |
| LR-Fluo-56 | TGTGTGTGTGTGT TGAGTAATTCGGTTGTATTGCTGAGTAGCTCA  | Face-1 Fluo handle |
| LR-Fluo-57 | TGTGTGTGTGTGT TTAGAACCTACTTTGAGAGGTCAGTACGGTG   | Face-1 Fluo handle |
| LR-Fluo-58 | TGTGTGTGTGTGT CCGATAGTATGACAACCTCATCTTAAATACGT  | Face-1 Fluo handle |
| LR-Fluo-59 | TGTGTGTGTGTGT CTTTCGAGATATTCGGAGGCGAAATAAAAGTT  | Face-1 Fluo handle |
| LR-Fluo-60 | TGTGTGTGTGTGT GGAGCCTTAGCGGAGTTGCTCAGTTGTATCAC  | Face-1 Fluo handle |
| LR-Fluo-61 | TGTGTGTGTGTGT TCCAATCGATTTATCAAATTTACG          | Face-1 Fluo handle |
| LR-Fluo-62 | TGTGTGTGTGTGT TTCTGTAATAGATTAAGAAACAAT          | Face-1 Fluo handle |
| LR-Fluo-63 | TGTGTGTGTGTGT CTTAACATGTAATAGACGCGAACT          | Face-1 Fluo handle |
| LR-Fluo-64 | TGTGTGTGTGTGT AACTATCGAATTAACCAAATAC            | Face-1 Fluo handle |
| LR-Fluo-65 | TGTGTGTGTGTGT TTGGAACAATCACCGACTGCC             | Face-1 Fluo handle |
| LR-Fluo-66 | TGTGTGTGTGTGT ACTCCGTTTTCAACCACCGTGGGA          | Face-1 Fluo handle |
| LR-Fluo-67 | TGTGTGTGTGTGT AGGGTAGCCCGAGACGGATAGGT           | Face-1 Fluo handle |
| LR-Fluo-68 | TGTGTGTGTGTGT AAGCTAAAGTGTAGGTTCAAAGCG          | Face-1 Fluo handle |
| LR-Fluo-69 | TGTGTGTGTGTGT CCCTGTAACCTATATACAGGTGAG          | Face-1 Fluo handle |
| LR-Fluo-70 | TGTGTGTGTGTGT TTCCGACATGCGCAACTATACCAA          | Face-1 Fluo handle |
| LR-Fluo-71 | TGTGTGTGTGTGT TAACCGATGTGAATTTTTGTATC           | Face-1 Fluo handle |



|             |                                           |                    |
|-------------|-------------------------------------------|--------------------|
| LR-Fluo-72  | TGTGTGTGTGTGT ACAGTTTCTAATTGTAGCCTATTT    | Face-1 Fluo handle |
| LR-Fluo-73  | TGTGTGTGTGTGT TATTTTAGTAGAAAAATATCATAT    | Face-1 Fluo handle |
| LR-Fluo-74  | TGTGTGTGTGTGT ATATGTGATTTCAATTTATGATGAA   | Face-1 Fluo handle |
| LR-Fluo-75  | TGTGTGTGTGTGT CAGGAAAAAATACCTGTACACAG     | Face-1 Fluo handle |
| LR-Fluo-76  | TGTGTGTGTGTGT ATCCAGAAAAATGGTCCCAAGCGGA   | Face-1 Fluo handle |
| LR-Fluo-77  | TGTGTGTGTGTGT ATCAAAAGAAATCCTGCCCTTAC     | Face-1 Fluo handle |
| LR-Fluo-78  | TGTGTGTGTGTGT GATGAACGAAC TAGCAATTGTAAA   | Face-1 Fluo handle |
| LR-Fluo-79  | TGTGTGTGTGTGT TTGCCTGAATAATCAGAAAAACAGG   | Face-1 Fluo handle |
| LR-Fluo-80  | TGTGTGTGTGTGT AGCAATAACTATATTTGTTTGACC    | Face-1 Fluo handle |
| LR-Fluo-81  | TGTGTGTGTGTGT CATAACAGGGTGGCATCTTGATTCC   | Face-1 Fluo handle |
| LR-Fluo-82  | TGTGTGTGTGTGT GGATCGTCGCGAAAGATTTTCATGA   | Face-1 Fluo handle |
| LR-Fluo-83  | TGTGTGTGTGTGT AGGCTTGCGGCCATGTGAACCTAC    | Face-1 Fluo handle |
| LR-Fluo-84  | TGTGTGTGTGTGT GTAAATGAAGTACAAAACCCCTCAT   | Face-1 Fluo handle |
| LR-Fluo-85  | CCGGAATCATAATTACTTAATTCAGGCATTT           | Face-2 core        |
| LR-Fluo-86  | TAATTACATTTAACAAGTGAATAAAAGGAGGC          | Face-2 core        |
| LR-Fluo-87  | TTTTTAAATGGCATGGACGCTAAAGGACATTC          | Face-2 core        |
| LR-Fluo-88  | ACGCTCAATCGTCTGACAAATATTATGACCTGA         | Face-2 core        |
| LR-Fluo-89  | TTGCCCCAGCAGGCGAAATAGCCCGTGGTTTT          | Face-2 core        |
| LR-Fluo-90  | TGGTCCGAAACGTAAGTAATTCGTAATAATTC          | Face-2 core        |
| LR-Fluo-91  | ATATGTACCCCGGTTGGAAGTCTGGTCATTTTT         | Face-2 core        |
| LR-Fluo-92  | TCAATAACCTGTTTAGAGCCTCAGATAATGCT          | Face-2 core        |
| LR-Fluo-93  | GGCGGAGCTGAAAAGCAAGGCAACAACATAA           | Face-2 core        |
| LR-Fluo-94  | TAATAGTAGTACAGCAACCCCTGCAAACGGGTA         | Face-2 core        |
| LR-Fluo-95  | GAACGAGGGTAGCAACAGGGAGTTCACCAACC          | Face-2 core        |
| LR-Fluo-96  | ACTGAGTTTCGTACCATTTTTCTGGGAATAGG          | Face-2 core        |
| LR-Fluo-97  | GCGTTATAGCACCCAGCCGGTATTCGTCAAAAAGACGGGAG | Face-2 core        |
| LR-Fluo-98  | ACAAACATAATTCATCTACCATATAGACATTAAGTAAATA  | Face-2 core        |
| LR-Fluo-99  | ACCAGTAAATAATCAACCTCACTTATTAGAGCTTTGCCCG  | Face-2 core        |
| LR-Fluo-100 | TTATTTACAGTTGAAAAGCATCACATTTAGAAATACAAAC  | Face-2 core        |
| LR-Fluo-101 | CGCCTGGCCAGGGCTTCTCGAATTCTCGTGGAGTGACTC   | Face-2 core        |
| LR-Fluo-102 | CGTTAATAGATTGCGGATCGGAAACAGTGCACCCCGCTT   | Face-2 core        |
| LR-Fluo-103 | AAGATTGTGCGAAAAGGCCATTCAGGGATGTCGTCAACCT  | Face-2 core        |
| LR-Fluo-104 | ATTAGATACCTCGTTTTATTTCATTGCATAATATACGTCGA | Face-2 core        |
| LR-Fluo-105 | CAATTCTGTAGCGAGAGATAGCGTTTACAGGTTTATACCA  | Face-2 core        |
| LR-Fluo-106 | GGAAGTTTAGATAGGCGCGCAGGGATAAGGCTAATTACCT  | Face-2 core        |
| LR-Fluo-107 | AGAGGCTTCTTGACAAGAAAAGAGGGAGTAGTAGAGATGGT | Face-2 core        |
| LR-Fluo-108 | TTTACAGGGCCACCCTCCGATTGGCGAATCAAGGTCAACCA | Face-2 core        |
| LR-Fluo-109 | ATGATGGCCAAGAAAAGAATATACCTACTTTAGAAATGC   | Face-2 core        |
| LR-Fluo-110 | TTTGGATTTAATGAGCTTACCAAGCAGTACATAATTTTCC  | Face-2 core        |
| LR-Fluo-111 | AAATCAACATTGGCAGAACCCCTTCCCGCCAGCAGAACTCA | Face-2 core        |
| LR-Fluo-112 | TGAGTAAACCTGAGAGGCGCCAGGGAGATAGGGTTCCAGT  | Face-2 core        |
| LR-Fluo-113 | GTTACCTCTTTCAACAACGGGTGTGCAAAATCGAACGTGG  | Face-2 core        |
| LR-Fluo-114 | GCCAGCTGATAAGCAAAAATCAGCAGCAAAACATGCCGGAG | Face-2 core        |
| LR-Fluo-115 | ATCATAACCATTTGCCATCAAAAAGCGGCTAACAAAATA   | Face-2 core        |
| LR-Fluo-116 | AACCAAAACGAACGAGTAAATATGAGAATTAGCATTATGA  | Face-2 core        |
| LR-Fluo-117 | GTTTTGCCCATTTCCATTTTCATTATTAACATCGCCTTTAT | Face-2 core        |
| LR-Fluo-118 | AGAGTAATTGAGGACTTACGAAGGAAAGGCCGCCACGCA   | Face-2 core        |
| LR-Fluo-119 | CAGAGCCGATAGCAAGTATAGCCCTATGGGATAACTTTCA  | Face-2 core        |
| LR-Fluo-120 | GAGCCACCCACCCTCAGGAGGTTGTCTTTCAAAGGAAC    | Face-2 core        |
| LR-Fluo-121 | GAGCGTCTTTGTTTAACTAAGAACTCATCGTA          | Face-3 core        |
| LR-Fluo-122 | TTCTGATTTACAGAGCAAAATCAAAGCAAAT           | Face-3 core        |
| LR-Fluo-123 | TAACCACCAGAAATAGCTGAATAAAGAAATTG          | Face-3 core        |
| LR-Fluo-124 | TTATCTAAATTTGAGGCTTGCTGAGTGCCACG          | Face-3 core        |
| LR-Fluo-125 | ATTTCTCCGTAAGCAACGTAATCATGTTTCCT          | Face-3 core        |
| LR-Fluo-126 | GACTGAATGGCCTGGCGACGAGGATTCACACA          | Face-3 core        |
| LR-Fluo-127 | CCAGGGTTGCCAGGGTGTGCGCACTCCAGCC           | Face-3 core        |
| LR-Fluo-128 | GTAAGAGCATTTCATGCGAAAACCCGGATCC           | Face-3 core        |
| LR-Fluo-129 | ATACATAACAACATTACCAATACTGAAAACGA          | Face-3 core        |
| LR-Fluo-130 | CAGTTTAGTGAGATGAGGTAATAGGCTTTTAC          | Face-3 core        |
| LR-Fluo-131 | TTACCCAAACCAGAACACAGATGAAGACGGTC          | Face-3 core        |
| LR-Fluo-132 | CCGGAACCTAGCGACACTTGATATATAAATCC          | Face-3 core        |
| LR-Fluo-133 | AGCAGCCTTATCTGAATTATCCAG                  | Face-3 core        |
| LR-Fluo-134 | CGGAACAAAGAAAGGAGCCTGATTG                 | Face-3 core        |

|             |                                           |             |
|-------------|-------------------------------------------|-------------|
| LR-Fluo-135 | GATAATACAATATCTTCAGTTGGC                  | Face-3 core |
| LR-Fluo-136 | TGCCATCTGAACTCTGTGGTGTA                   | Face-3 core |
| LR-Fluo-137 | AATATAGGCGGCTGACTGGTGCTT                  | Face-3 core |
| LR-Fluo-138 | CAGGAGAATCCAGTGCTATTAC                    | Face-3 core |
| LR-Fluo-139 | GGTTGTGAAACAGGCGCTGCAACT                  | Face-3 core |
| LR-Fluo-140 | TAACGGAACGCCAAAAACGATAAA                  | Face-3 core |
| LR-Fluo-141 | TCATCAGTGAATACCACAAAAGAA                  | Face-3 core |
| LR-Fluo-142 | CGAGAAACATCAACGTCTTCATCA                  | Face-3 core |
| LR-Fluo-143 | GTAATCAGAGAGCCACGCCTCCCT                  | Face-3 core |
| LR-Fluo-144 | TAGCGTCAGCCATCTTCACCCCTCA                 | Face-3 core |
| LR-Fluo-145 | AATTAECTCCAATAATTCCTTATC                  | Face-3 core |
| LR-Fluo-146 | ACATAAAAAATAGCTAAACAGTAC                  | Face-3 core |
| LR-Fluo-147 | AACGTTATAAGTAAGCTTTTCAGG                  | Face-3 core |
| LR-Fluo-148 | AATTCGACAGGAAACCCAGAAGAT                  | Face-3 core |
| LR-Fluo-149 | TATGATACACCCAAAAGTGCCTAA                  | Face-3 core |
| LR-Fluo-150 | CTAATCTAATTACGCAACGAGCCG                  | Face-3 core |
| LR-Fluo-151 | TATGACAACATACATAATCTGCCA                  | Face-3 core |
| LR-Fluo-152 | CTTAAGTGGCAAAGACATATCGCG                  | Face-3 core |
| LR-Fluo-153 | GTCAGGACACAATCAAAAAGATT                   | Face-3 core |
| LR-Fluo-154 | TATGCGATCGCCAAAAGTATTATAG                 | Face-3 core |
| LR-Fluo-155 | TTAATTTCTGAGGGAGTGTGTCGA                  | Face-3 core |
| LR-Fluo-156 | TGAAACCAATTCATTATGCCTTGA                  | Face-3 core |
| LR-Fluo-157 | AGCATGTAATAATCGTACCGCGCGCATTAAATGAAAAT    | Face-4 core |
| LR-Fluo-158 | AACGGATTGAGATGAACGTAACAAAGTTTGTGCTTTTG    | Face-4 core |
| LR-Fluo-159 | GATAGCCCGGTGAGGCAACACCGCTTAAATCCCGTCAATA  | Face-4 core |
| LR-Fluo-160 | GAATCACACTAACCGACAGCAGCACGGAGACTGTATTCCC  | Face-4 core |
| LR-Fluo-161 | GCTTTCCAAAGTGAATTGTTATCCGCCCTGGTGGGCACG   | Face-4 core |
| LR-Fluo-162 | ACAAACGGGGACGACGCCTCAGGACAAAATAAGCTTTCT   | Face-4 core |
| LR-Fluo-163 | CACGTTGGCGCATCGTGGCACCGCGCTGAATTTTCTAAGT  | Face-4 core |
| LR-Fluo-164 | AACCAGACGCCCGAAATGCTTTAAGAAAAATCAAAACGAAC | Face-4 core |
| LR-Fluo-165 | GATTAGAGAAAGCGGAATAAATCACTGGCTCAAGAAAGAT  | Face-4 core |
| LR-Fluo-166 | GCGCGAAAACCTGCTCAGCCGGAATCATTGTGTGCCCTGA  | Face-4 core |
| LR-Fluo-167 | ATCTATAAGCCCGCCGGGAACCGAGCGGCTTAATTGACC   | Face-4 core |
| LR-Fluo-168 | CGGAACCTGTTTTAACGCCAGAAATCCGGAAACTTTGCCTT | Face-4 core |
| LR-Fluo-169 | CTTCAATCGAAACTTAGGTAAGTAGAACGCGTTCAATA    | Face-4 core |
| LR-Fluo-170 | TTTAACGTGCGCTGATACCAAGTTTATTAATTAATCAAT   | Face-4 core |
| LR-Fluo-171 | AAAACAGATAAAACATATATTTTTGAGTAGACATTGCAA   | Face-4 core |
| LR-Fluo-172 | TGAGTGAGTTAATTGCGGAGAGGCGGTGTGTTGTTGAAAT  | Face-4 core |
| LR-Fluo-173 | GAAGCATAGTCGGGAACCGAGTGCCTATTAACCTTATAA   | Face-4 core |
| LR-Fluo-174 | GTTTGAGGCGGATTGAATGTGAGCTAAATTAAGAGAATC   | Face-4 core |
| LR-Fluo-175 | TTTATGGGTGTAGTAAGCCTTCCTAGAGATCTTCAGGTCA  | Face-4 core |
| LR-Fluo-176 | AAGAGGAACGGGAAGCAAGAGCTTAACCAAAAACAAAATTA | Face-4 core |
| LR-Fluo-177 | TCAGAAGCAGTACCTTTTTGATACGGGAGAACAATAAAT   | Face-4 core |
| LR-Fluo-178 | AATCCGCGCAAAGTACCTAAAACAAACCATCGCTTTTGCG  | Face-4 core |
| LR-Fluo-179 | GTAACAGTACAGTTAACCGTTCGAGTCGTAACCTTGCCTG  | Face-4 core |
| LR-Fluo-180 | GGTAATAAATATTCTCGGGGTTTGAAGATAGAGACGTTA   | Face-4 core |
| LR-Fluo-181 | GAACAATGAAATAGCAGGGAACCAATAGC             | Face-4 core |
| LR-Fluo-182 | AAGCCCTTTTTAAGAATAATTTAAGAAATAA           | Face-4 core |
| LR-Fluo-183 | GAACAAAGTTACCAGAACTCGTACTGCAACA           | Face-4 core |
| LR-Fluo-184 | GCAATAATAACGGAATCGACAGTGAATATAGC          | Face-4 core |
| LR-Fluo-185 | ATGATTAAGACTCCTTTTTACGCTCGCTCACA          | Face-4 core |
| LR-Fluo-186 | GCAAACGTAGAAAATATGTCCCGCAGATCGCA          | Face-4 core |
| LR-Fluo-187 | AACATATAAAAGAAACTCCTTAGTTTCTGGTG          | Face-4 core |
| LR-Fluo-188 | ATAAGTTTATTTGTGTTGGGAAACAGTTCA            | Face-4 core |
| LR-Fluo-189 | TCATATGGTTTACCAGTTTAAGAAAAATCAG           | Face-4 core |
| LR-Fluo-190 | GCGACATTCAACCGATAACTTTAACGAGGCGC          | Face-4 core |
| LR-Fluo-191 | AATATTGACGGAATTTTCGATAGCAACAACAA          | Face-4 core |
| LR-Fluo-192 | TTATCACCGTACCGGATAGCAAGGGGAAAGCGCAGTCTCT  | Face-4 core |

**DNA Strands of Large Rod (LR) for AuNP Cellular Internalization Study**

| Name    | Sequence                         | Note |
|---------|----------------------------------|------|
| LR-Au-1 | CCAGACGAGGAATCATGCTGTCTTAAGAGCAA | core |
| LR-Au-2 | CGACAAAACATCGGGAGACGCTGAGAAGATC  | core |

|          |                                                        |                    |
|----------|--------------------------------------------------------|--------------------|
| LR-Au-3  | GCGCATACTATTTGCATATACAGTTCTTACCG                       | core               |
| LR-Au-4  | TTATGAATTGCTTATGATCCTTGAAAACATAG                       | core               |
| LR-Au-5  | ATTAGTCTCGTGTATTGGTCAAGAAGATAGCC                       | core               |
| LR-Au-6  | CACAGACACGCCATTAGTTGTAGCAATACTTC                       | core               |
| LR-Au-7  | ATACGTGGCTGAGAGCACACCACGAGGAAAC                        | core               |
| LR-Au-8  | ACGCGCGGGTTGCGCTGTAAAAGAGTCTGTCC                       | core               |
| LR-Au-9  | ATCGGCCAGTGTGAAAAGCCTGGGGAAGTGGC                       | core               |
| LR-Au-10 | GATTCGTGACCTGTCTACGTCAAAGGGCGAAA                       | core               |
| LR-Au-11 | ACCCGTGCAAAATCGGACAGTCATGTATGTTA                       | core               |
| LR-Au-12 | AACATTAACCGTAATGAGTCAAATCACCATCA                       | core               |
| LR-Au-13 | CTTTCATCAGCTTTCCAACCGTGCAAGGTGGC                       | core               |
| LR-Au-14 | CGCGTCTGTTGAGCTAAAGATTCAAAGGGT                         | core               |
| LR-Au-15 | ATATAATTCCCTCAAAGACTTCAAACCACGGA                       | core               |
| LR-Au-16 | GATGGCTTAACTCCAATTTTAAATGCAATGCC                       | core               |
| LR-Au-17 | TTTTTGCGGAATGACCTTGCATCATAGAAAA                        | core               |
| LR-Au-18 | AGCGCTCCTAATTGATGCAAGGATAAAAAATT                       | core               |
| LR-Au-19 | TGACCCCCCTTACTTCATGTGACACAAAAGG                        | core               |
| LR-Au-20 | AGAATACAAACGGAGACTTAAACAGCTTGATA                       | core               |
| LR-Au-21 | GAGGCAAAAATCATAATGATAAATGGAAGGTA                       | core               |
| LR-Au-22 | GATAAGTGTGCCCCCTTCGGTTTATCAGCTTG                       | core               |
| LR-Au-23 | ACCAGGCGTCATTAAGGGGTGAGAAGGTGAA                        | core               |
| LR-Au-24 | AGGATTAGGAAACATGAAAAAGGCTCCAAAA                        | core               |
| LR-Au-25 | AGGCTTATCTACAATTTCTTACCAACGCTAAC                       | core               |
| LR-Au-26 | GATATAGAGTAATAAGCAATTTAGGCCTGAAT                       | core               |
| LR-Au-27 | TTAGAACCAATATAATCGGAATTATCATCATA                       | core               |
| LR-Au-28 | TGGAAGGGCATTTCAAAAAGAAGGAATTACC                        | core               |
| LR-Au-29 | TATCAAACCTATCTGGTTAGGAGCACTAACAAC                      | core               |
| LR-Au-30 | ACCTCAAAGAGATAGATTCACCAACATTTTG                        | core               |
| LR-Au-31 | AAATCTAAGGACTGGTACCTCATTGAGGAAGG                       | core               |
| LR-Au-32 | TGGTCGAACGTATTGGAGTTGCAGACGCTGGT                       | core               |
| LR-Au-33 | GTACCGAGAAGCTACGGCATTTCACATAAATC                       | core               |
| LR-Au-34 | ATCCCCGGCCAGTGAGGCTGATTGTTTGATGG                       | core               |
| LR-Au-35 | GAAGGGCGGCCTCTTCCACGACGTTGTAAAAC                       | core               |
| LR-Au-36 | ACTGTTGGTTTTGTTATATTTAATGTCAATC                        | core               |
| LR-Au-37 | GCCATTCGGGGATGTGATTAAGTTGGGTAACG                       | core               |
| LR-Au-38 | GGCAAAGCAGGAACGCAAAACCCAAAAAGTGG                       | core               |
| LR-Au-39 | GTCATAAAACCAGACGGGAATTACGAGGCATA                       | core               |
| LR-Au-40 | GCGGAATCACATGTTTTAGATTATCATTTGG                        | core               |
| LR-Au-41 | TTAGACTGGGCTTTTGCATTCAACTAATGCAG                       | core               |
| LR-Au-42 | TAAAATGTTCTGGAAGTATAACAGAATTCTAC                       | core               |
| LR-Au-43 | CAGACCAGTGGCTGACAACAAAGCTGCTCATT                       | core               |
| LR-Au-44 | ACGGTGTAATGCCACAAGACTTCAGCATCG                         | core               |
| LR-Au-45 | CCAACTTTGAAGAACCACCGCCGGATATTCA                        | core               |
| LR-Au-46 | TCACATGAGATATAAGCCCAATAGACCGTAAC                       | core               |
| LR-Au-47 | AGGTCAGAAGAACCGCTTCATAATCAAATCA                        | core               |
| LR-Au-48 | GTTGAGCCGTAICTAGAGCCACCCTACAACG                        | core               |
| LR-Au-49 | AAAAAAAAAAAAAAAAAAAAA AATAGTGACAAGACAAAATCTGTTCGAGCCA  | Face-1 AuNP handle |
| LR-Au-50 | AAAAAAAAAAAAAAAAAAAAA CGATAGCTATCGTCGCACAAAATCGAATTATT | Face-1 AuNP handle |
| LR-Au-51 | AAAAAAAAAAAAAAAAAAAAA TTTGATTACACTTGCCGAATGGCTTGGCCAAC | Face-1 AuNP handle |
| LR-Au-52 | AAAAAAAAAAAAAAAAAAAAA ATCACGCAGCCTTGCTGGTTAAGAAAGCGTTG | Face-1 AuNP handle |
| LR-Au-53 | AAAAAAAAAAAAAAAAAAAAA AACCGTCTAGAGTCCAATTAATGATCTTTTCA | Face-1 AuNP handle |
| LR-Au-54 | AAAAAAAAAAAAAAAAAAAAA ATATGATACTAGCTGAGAGTAACAGCATTAAA | Face-1 AuNP handle |
| LR-Au-55 | AAAAAAAAAAAAAAAAAAAAA GAGAAAGGTATTTTGGTAGCCAGTAACCAAT  | Face-1 AuNP handle |
| LR-Au-56 | AAAAAAAAAAAAAAAAAAAAA TGAGTAATTCGGTTGTATTGCTGAGTAGCTCA | Face-1 AuNP handle |
| LR-Au-57 | AAAAAAAAAAAAAAAAAAAAA TTAGAACCCTACTTTTGGAGGTCAGTACGGTG | Face-1 AuNP handle |
| LR-Au-58 | AAAAAAAAAAAAAAAAAAAAA CCGATAGTATGACAACCTCATCTTAAATACGT | Face-1 AuNP handle |
| LR-Au-59 | AAAAAAAAAAAAAAAAAAAAA CTTTCGAGATATTGGAGGCGCAATAAAAGTT  | Face-1 AuNP handle |
| LR-Au-60 | AAAAAAAAAAAAAAAAAAAAA GGAGCCTTAGCGGAGTTGCTCAGTTGTATCAC | Face-1 AuNP handle |
| LR-Au-61 | AAAAAAAAAAAAAAAAAAAAA TCCAATCGATTTATCAAATTTACG         | Face-1 AuNP handle |
| LR-Au-62 | AAAAAAAAAAAAAAAAAAAAA TTCTGTAATAGATTAAGAAACAAT         | Face-1 AuNP handle |
| LR-Au-63 | AAAAAAAAAAAAAAAAAAAAA CTTAACATGTAATAGACGCGAACT         | Face-1 AuNP handle |
| LR-Au-64 | AAAAAAAAAAAAAAAAAAAAA AACTATCGAATTAACCAAATACC          | Face-1 AuNP handle |
| LR-Au-65 | AAAAAAAAAAAAAAAAAAAAA TTGGAACAATCACCGACACTGCC          | Face-1 AuNP handle |
| LR-Au-66 | AAAAAAAAAAAAAAAAAAAAA ACTCCGTTTTCAACCACCGTGGGA         | Face-1 AuNP handle |

|           |                                                 |                    |
|-----------|-------------------------------------------------|--------------------|
| LR-Au-67  | AAAAAAAAAAAAAAAAAAAAAGGGTAGCCCGGAGACGGATAGGT    | Face-1 AuNP handle |
| LR-Au-68  | AAAAAAAAAAAAAAAAAAAAAAGCTAAAGTGATGGTTCAAAGCG    | Face-1 AuNP handle |
| LR-Au-69  | AAAAAAAAAAAAAAAAAAAAA CCCTGTAACCTATATACAGGTCAG  | Face-1 AuNP handle |
| LR-Au-70  | AAAAAAAAAAAAAAAAAAAAA TTCCGACATGCGCAACTATACCAA  | Face-1 AuNP handle |
| LR-Au-71  | AAAAAAAAAAAAAAAAAAAAA TAACCGATGCGAATTTTTGTATC   | Face-1 AuNP handle |
| LR-Au-72  | AAAAAAAAAAAAAAAAAAAAA ACAGTTTCTAATTGTAGCCTATTT  | Face-1 AuNP handle |
| LR-Au-73  | AAAAAAAAAAAAAAAAAAAAA TATTTAGTAGAAAATATCATAT    | Face-1 AuNP handle |
| LR-Au-74  | AAAAAAAAAAAAAAAAAAAAA ATATGTGATTTTCATTTATGATGAA | Face-1 AuNP handle |
| LR-Au-75  | AAAAAAAAAAAAAAAAAAAAA CAGGAAAAAATACCTGTCCACACG  | Face-1 AuNP handle |
| LR-Au-76  | AAAAAAAAAAAAAAAAAAAAA ATCCAGAAAATGGTCCCAAGCGGA  | Face-1 AuNP handle |
| LR-Au-77  | AAAAAAAAAAAAAAAAAAAAA ATCAAAGAAATCCTGCCCTTCAC   | Face-1 AuNP handle |
| LR-Au-78  | AAAAAAAAAAAAAAAAAAAAA GATGAACGAAGTACGAATTGTAAA  | Face-1 AuNP handle |
| LR-Au-79  | AAAAAAAAAAAAAAAAAAAAA TTGCCTGAATAATCAGAAAACAGG  | Face-1 AuNP handle |
| LR-Au-80  | AAAAAAAAAAAAAAAAAAAAA AGCAATAACTATATTTGTTTGACC  | Face-1 AuNP handle |
| LR-Au-81  | AAAAAAAAAAAAAAAAAAAAA CATAcAGGGTGGCATCTTGATTCC  | Face-1 AuNP handle |
| LR-Au-82  | AAAAAAAAAAAAAAAAAAAAA GGATCGTCGCGAAAGATTTTCATGA | Face-1 AuNP handle |
| LR-Au-83  | AAAAAAAAAAAAAAAAAAAAA AGGCTTGCGGCCATGTGAACCTAC  | Face-1 AuNP handle |
| LR-Au-84  | AAAAAAAAAAAAAAAAAAAAA GTAATGAAGTACAAAACCTCAT    | Face-1 AuNP handle |
| LR-Au-85  | CCGGAATCATAATTACTTAATTCAGGCATTT                 | Face-2 core        |
| LR-Au-86  | TAATTACATTTAACAAGTGAATAAAAGGAGGC                | Face-2 core        |
| LR-Au-87  | TTTTTTAATGGCATGGACGCTAAAGGACATTC                | Face-2 core        |
| LR-Au-88  | ACGCTCAATCGTCTGACAAATATTATGACCTGA               | Face-2 core        |
| LR-Au-89  | TTGCCCCAGCAGGCGAAATAGCCCGTGGTTTT                | Face-2 core        |
| LR-Au-90  | TGGTTCGGAACGTAAGTAATTCGTAATAATC                 | Face-2 core        |
| LR-Au-91  | ATATGTACCCCGTTGGAGTCTGGTCATTTTT                 | Face-2 core        |
| LR-Au-92  | TCAATAACCTGTTTAGAGCCTCAGATAATGCT                | Face-2 core        |
| LR-Au-93  | GGCGCGAGCTGAAAAGCAAGGCAACAACATAA                | Face-2 core        |
| LR-Au-94  | TAATAGTAGTACAGCAACCCTGCAAACGGGTA                | Face-2 core        |
| LR-Au-95  | GAACGAGGGTAGCAACAGGGAGTTCCACCAAC                | Face-2 core        |
| LR-Au-96  | ACTGAGTTTCGTCACCATTTTCGGGAATAGG                 | Face-2 core        |
| LR-Au-97  | GCGTTATAGCACCCAGCCGGTATTCGTCAAAAGACGGGAG        | Face-2 core        |
| LR-Au-98  | ACAAACATAATTCATCTACCATATAGACATTAAGTAAATA        | Face-2 core        |
| LR-Au-99  | ACCAGTAAATAATCAACCTCACTTATTAGAGCTTTGCCCG        | Face-2 core        |
| LR-Au-100 | TTATTTACAGTTGAAAAGCATCACATTTAGAATTCACAAAC       | Face-2 core        |
| LR-Au-101 | CGCCTGGCCAGGGCTTCTCGAATTCCTGTCGGAGTGACTC        | Face-2 core        |
| LR-Au-102 | CGTTAATAGATTGCGGATCGGAAACAGTGCCACCCCGCTT        | Face-2 core        |
| LR-Au-103 | AAGATTGTGCGAAAAGCCATTACGGGATGTTCTGCTCAACCT      | Face-2 core        |
| LR-Au-104 | ATTAGATACCTCGTTTTATTTCATTGCATAATATACGTCGA       | Face-2 core        |
| LR-Au-105 | CAATTCGTAGCGAGAGATAGCGTTTACAGGTTTATACCA         | Face-2 core        |
| LR-Au-106 | GGAAAGTTTAGATAGCGCGCAGGGATAAGGCTAATTACCT        | Face-2 core        |
| LR-Au-107 | AGAGGCTTCTTGACAAGAAAGAGGGAGTAGTAGAGATGGT        | Face-2 core        |
| LR-Au-108 | TTTCAGGGCCACCCTCCGATTGGCAATCAAGGTCACCAA         | Face-2 core        |
| LR-Au-109 | ATGATGGCCAAGAAAAGAATATACCTACTTTAGAATGC          | Face-2 core        |
| LR-Au-110 | TTTGGATTTAATGAGCTTACCAAGCAGTACATAATTTTCC        | Face-2 core        |
| LR-Au-111 | AAATCAACATTGGCAGAACCCCTTCCC GCCAGCAGAACTCA      | Face-2 core        |
| LR-Au-112 | TGAGTAAACCTGAGAGGCGCCAGGGAGATAGGGTTCCAGT        | Face-2 core        |
| LR-Au-113 | GTTACCTCTTTCAACAACGGGTGTGCAAAAATCGAACGTGG       | Face-2 core        |
| LR-Au-114 | GCCAGCTGATAAGCAAAAATCAGCAGCAAAACATGCCGGAG       | Face-2 core        |
| LR-Au-115 | ATCATAACCATTTCCGCATCAAAAAGCGGCTAACAAAATA        | Face-2 core        |
| LR-Au-116 | AACCAAAACGAACGAGTAAATATGAGAATTAGCATTATGA        | Face-2 core        |
| LR-Au-117 | GTTTTGCCCATTTCCATTTTCATTATTAACATCGCCTTTAT       | Face-2 core        |
| LR-Au-118 | AGAGTAATTGAGGACTTACGAAGGAAAGGCCGCCACGCA         | Face-2 core        |
| LR-Au-119 | CAGAGCCGATAGCAAGTATAGCCCTATGGGATAACTTTCA        | Face-2 core        |
| LR-Au-120 | GAGCCACCACCCTCAGGAGTTTTGTCTTTCCAAAGGAAC         | Face-2 core        |
| LR-Au-121 | GAGCGTCTTTGTTTAACTAAGAACTCATCGTA                | Face-3 core        |
| LR-Au-122 | TTCTGATTTACAGAGCAAAATCAAGCAAAT                  | Face-3 core        |
| LR-Au-123 | TAACCACCAGAAATAGCTGAATAAAGAAATTG                | Face-3 core        |
| LR-Au-124 | TTATCTAAATTTGAGGCTTGCTGAGTGCCACG                | Face-3 core        |
| LR-Au-125 | ATTTCTCCGTAAGCAACGTAATCATGTTTCT                 | Face-3 core        |
| LR-Au-126 | GACTGAATGGCCTGGCGACGGAGGATTCCACA                | Face-3 core        |
| LR-Au-127 | CCAGGGTTGCCAGGGTGTGCGCACTCCAGCC                 | Face-3 core        |
| LR-Au-128 | GTAAGAGCATTTCATGCGAAAACCCCGGATCC                | Face-3 core        |
| LR-Au-129 | ATACATAACAACATTACCAATACTGAAAACGA                | Face-3 core        |

|           |                                            |             |
|-----------|--------------------------------------------|-------------|
| LR-Au-130 | CAGTTTAGTGAGATGAGGTAATAGGTCTTTAC           | Face-3 core |
| LR-Au-131 | TTACCCAAACCAGAACACAGATGAAGACGGTC           | Face-3 core |
| LR-Au-132 | CCGGAACCTAGCGACACTTGATATATAAATCC           | Face-3 core |
| LR-Au-133 | AGCAGCCTTATCTGAATTATCCAG                   | Face-3 core |
| LR-Au-134 | CGGAACAAAGAAGGAGCCTGATTG                   | Face-3 core |
| LR-Au-135 | GATAATACAATATCTTCAGTTGGC                   | Face-3 core |
| LR-Au-136 | TGCCATCTGAACTCTGTGGTGTA                    | Face-3 core |
| LR-Au-137 | AATATAGGCGGCTGACTGGTGCTT                   | Face-3 core |
| LR-Au-138 | CAGGAGAATCCCAGTGCTATTAC                    | Face-3 core |
| LR-Au-139 | GGTTGTGAAACAGGCGCTGCAACT                   | Face-3 core |
| LR-Au-140 | TAACGGAACGCCAAAAACGATAAA                   | Face-3 core |
| LR-Au-141 | TCATCAGTGAAACCACAAAAGAA                    | Face-3 core |
| LR-Au-142 | CGAGAAACATCAACGTCTTCATCA                   | Face-3 core |
| LR-Au-143 | GTAAATCAGAGGCCACGCCTCCCT                   | Face-3 core |
| LR-Au-144 | TAGCGTCAGCCATCTTACCCTCA                    | Face-3 core |
| LR-Au-145 | AATTAACCTCAATAATTCTTATC                    | Face-3 core |
| LR-Au-146 | ACATAAAAAATAGCTAACAGTAC                    | Face-3 core |
| LR-Au-147 | AACGTTATAAGTAAGCTTTTCAGG                   | Face-3 core |
| LR-Au-148 | AATTCGACAGGAAACCCAGAAGAT                   | Face-3 core |
| LR-Au-149 | TATGATACCCAAAAGTGCCTAA                     | Face-3 core |
| LR-Au-150 | CTAATCTAATTACGCAACGAGCCG                   | Face-3 core |
| LR-Au-151 | TATGACAACATACATAATCTGCCA                   | Face-3 core |
| LR-Au-152 | CTTAAGTGGCAAAGACATATCGCG                   | Face-3 core |
| LR-Au-153 | GTCAGGACACAATCAAAAAGATT                    | Face-3 core |
| LR-Au-154 | TATGCGATCGCCAAAAGTATTATAG                  | Face-3 core |
| LR-Au-155 | TTAATTTCTGAGGGAGTGTGCGA                    | Face-3 core |
| LR-Au-156 | TGAAACCAATTCATTATGCCTTGA                   | Face-3 core |
| LR-Au-157 | AGCATGTAATAATCGTACCGCGCGCATTAAAGAAAAT      | Face-4 core |
| LR-Au-158 | AACGGATTCAGATGAACGTAAAACAAAGTTTGTCAATTTTG  | Face-4 core |
| LR-Au-159 | GATAGCCCGGTGAGGCAACACCGCTTAAATCCCGTCAATA   | Face-4 core |
| LR-Au-160 | GAATCACACTAACCGACAGCAGCAGCGGAGACTGTATTCCC  | Face-4 core |
| LR-Au-161 | GCTTTCCAAAGTGAATTGTTATCCGCCCTGGTGGGCACG    | Face-4 core |
| LR-Au-162 | ACAAACGGGGACGACGCCTCAGGACAAAATAAAGCTTTCT   | Face-4 core |
| LR-Au-163 | CACGTTGGCGCATCGTGGCACCGCGCTGAATTTTCTAAGT   | Face-4 core |
| LR-Au-164 | AACCAGACGCCGAAATGCTTTAAGAAAAATCAACGAAAC    | Face-4 core |
| LR-Au-165 | GATTAGAGAAAGCGGAATAAATCACTGGCTCAAGAAAAGAT  | Face-4 core |
| LR-Au-166 | GCGCGAAAACCTGCTCAGCCGGAATCATTGTGTGCCCTGA   | Face-4 core |
| LR-Au-167 | ATCTATAAGCCCGCGGGAACCGAGCGGCTTAATTGACC     | Face-4 core |
| LR-Au-168 | CGGAACCTGTTTTAACGCCAGAATCCGGAAACTTTGCCTT   | Face-4 core |
| LR-Au-169 | CTTCAATCGAAACTTAGGTAAGTAGAACGCGTTCAAATA    | Face-4 core |
| LR-Au-170 | TTTAACGTGCGCTGATACCAAGTTTATTAATTAATCAAT    | Face-4 core |
| LR-Au-171 | AAAACAGATAAAACATATATTTTTTGTAGTAGACTTGCAA   | Face-4 core |
| LR-Au-172 | TGAGTGAGTTAATTGCGGAGAGCGGTGTGTTGTTGAAAT    | Face-4 core |
| LR-Au-173 | GAAGCATAGTCGGGAACCGCTGCCTATTAACCTTATAA     | Face-4 core |
| LR-Au-174 | GTTTGAGGCGGATTGAATGTGAGCTAAATTAAGAGAATC    | Face-4 core |
| LR-Au-175 | TTTATGGGTGTAGTAAGCCTTCTAGAGATCTTCAGGTCA    | Face-4 core |
| LR-Au-176 | AAGAGGAACGGAAGCAAGAGCTTAACCAAAAAACAAATTA   | Face-4 core |
| LR-Au-177 | TCAGAAGCAGTACCTTTTTTGTATACGGGAGAACAATAAT   | Face-4 core |
| LR-Au-178 | AATCCGCGCAAAGTACCTAAAACAAACCATCGCTTTTGCG   | Face-4 core |
| LR-Au-179 | GTAACAGTACAGTTAACCGTGCAGTGTAAACTTTGCCTG    | Face-4 core |
| LR-Au-180 | GGTAATAAATTATTCTCGGGGTTTGTAGAAATAGAGACGTTA | Face-4 core |
| LR-Au-181 | GAAACAATGAAATAGCACAGGGAACCAATAGC           | Face-4 core |
| LR-Au-182 | AAGCCCTTTTTAAGAATAATTTAAGAAATAA            | Face-4 core |
| LR-Au-183 | GAACAAAGTTACCAGAACTCGTACTGCAACA            | Face-4 core |
| LR-Au-184 | GCAATAATAACGGAATCGACAGTGAATATAGC           | Face-4 core |
| LR-Au-185 | ATGATTAAGACTCCTTTTTACGCTCGCTCACA           | Face-4 core |
| LR-Au-186 | GCAAACGTAGAAAATATGTCCCGCAGATCGCA           | Face-4 core |
| LR-Au-187 | AACATATAAAAGAACTCCTTAGTTTCTGGTG            | Face-4 core |
| LR-Au-188 | ATAAGTTTATTTTGTGCTTGGGAAACAGTTCA           | Face-4 core |
| LR-Au-189 | TCATATGGTTTACCAGTTTAAAGAAAAATCAG           | Face-4 core |
| LR-Au-190 | GCGACATTC AACCGATAACTTTAACGAGGGCGC         | Face-4 core |
| LR-Au-191 | AATATTGACGGAAATTCGATAGCAACAACAA            | Face-4 core |
| LR-Au-192 | TTATACCCTCACCGATAGCAAGGGGAAAGCGCAGTCTCT    | Face-4 core |

DNA Strands of Large Tetrahedron (LT)

| Name       | Sequence                                                     | Note |
|------------|--------------------------------------------------------------|------|
| LT-Fluo-1  | GCAAGAGTCTGGAGCAATAATGCCGCCTACAAATACCC                       | Core |
| LT-Fluo-2  | GCGAAGAATACGTGGCATGGCCAAACGACCACTTGCTG                       | Core |
| LT-Fluo-3  | GATGTGCTTTCCTCGTTGATTAATTGCCTG                               | Core |
| LT-Fluo-4  | ATAGCTTTGACGAGCACGAACGGTTTTGATTAGTAATACCAG                   | Core |
| LT-Fluo-5  | AACAGGTGAGAAAGGCCAACCGTCGTCTGAAACAGGA                        | Core |
| LT-Fluo-6  | ACAGTCAAATCAACCTGAAAGCGTCGAACTGATAGCCCCACCAAGTTGCCCCAGTGCTTG | Core |
| LT-Fluo-7  | TCAGCTTCTAATCTATTACATAAAAGATCGGGACGACGAGA                    | Core |
| LT-Fluo-8  | CGBAAGCATAAAGTGATGGGAGAGGCGGTCAAGGCGATTTCG                   | Core |
| LT-Fluo-9  | CTGCGCTCACAATTCCAATGAGTTGGTGGTGCTCAATTCTA                    | Core |
| LT-Fluo-10 | CTATTCTGTGTGAAATCTACGTGGCAGCGTATTACATCA                      | Core |
| LT-Fluo-11 | GAAATTAATGTGAGCGAGTAAATGTTTGGATTATACCGGTGCGGCCAGCTCGGCTGA    | Core |
| LT-Fluo-12 | GAGGCTGATTATCAGATGATGTGCTCGGCAACTCCTGG                       | Core |
| LT-Fluo-13 | CTGATTCATCAATATAATACGCCACCTCAGGATCATT                        | Core |
| LT-Fluo-14 | AGTGCCCTGGAGTGACTCTTGAATTTCCGGCCGTGCATTTCT                   | Core |
| LT-Fluo-15 | TTCTAAGTGGTTGTGAACCGACAGTGGGCC                               | Core |
| LT-Fluo-16 | TTCCCATAGTAATCATACCCAAACTGACCTTCATCAACTTA                    | Core |
| LT-Fluo-17 | CGTTCGTAACACCGCTTTTGGGAAGGCCAGTGCCAAGCTTTCTCAGG              | Core |
| LT-Fluo-18 | CAATTTGAGGCACCTCCAGGCTCTGTACGACGTTGTACTTA                    | Core |
| LT-Fluo-19 | ACAGTTCAAACTCCAACAGCCCTCGTTTCTCAAATAAA                       | Core |
| LT-Fluo-20 | AAATTGAGGCAGCCGCAAAGCTAAATCGGTATTCAATTTGTAATCACTACG          | Core |
| LT-Fluo-21 | CTAGGCATCAATCTGATCGCAAAGTACGG                                | Core |
| LT-Fluo-22 | AGCGGAATTACGAGGCAACTAACGTAGG                                 | Core |
| LT-Fluo-23 | GGGTGGGAACCATCAACTAATGGAAGGGTTAGAACCTA                       | Core |
| LT-Fluo-24 | TCAACCAACCGTCCGACTGCCAGGAGTCCA                               | Core |
| LT-Fluo-25 | GTAGTTTCAGGCATTCCAACGTTAGTCCAAAAAAGGCTCCAAAAGG               | Core |
| LT-Fluo-26 | ATTGGAGACATCGCCATTAATAATCGCCAGGTGTTGAAAACAGG                 | Core |
| LT-Fluo-27 | GCTTACAGGGCGCGTACAGAAAGTGAACCGTTGTAGCACCAT                   | Core |
| LT-Fluo-28 | CTAACACCAGTCAGGACAAACAAAGCTTTAA                              | Core |
| LT-Fluo-29 | TCTCGCTGCGGTAACCGGAACCCCTCGAGGTGCCGTAAGGTT                   | Core |
| LT-Fluo-30 | TTCGAACGAGTGCGATTTGCAAGAACCGGATTGTA                          | Core |
| LT-Fluo-31 | CCGCGCTGGCAAGTGATATTTAGCCCAAATCAAGTTTGGAA                    | Core |
| LT-Fluo-32 | CTGTAGCCAGCTTTAAACGGCGGATTGACC                               | Core |
| LT-Fluo-33 | GGTGTAGATGGGCGCAGGACTCCAACGTCAA                              | Core |
| LT-Fluo-34 | TAATGGTCAAGAGATGGCTGCTCACAGACCAGGCGCATAACGG                  | Core |
| LT-Fluo-35 | TATTCTGATAGGCTATCAGGTCAATTTTGGAGACAGTATGTTGTT                | Core |
| LT-Fluo-36 | ATCGGAACGCCCTCATAG                                           | Core |
| LT-Fluo-37 | TCAGGCTGCGCAACTGCTGGTGCACGAATA                               | Core |
| LT-Fluo-38 | ATGGTCAGATAAAGGGTCCACCAGTCAACCAGA                            | Core |
| LT-Fluo-39 | TTTTACCAGCCATGTAAGCCAGATTCAATGAATCCCCACCA                    | Core |
| LT-Fluo-40 | GACAATCCCTTATAAGGGCTGGCGGGTAACGCCAGGGTATTG                   | Core |
| LT-Fluo-41 | TCGGTGGGCGGAAACCA                                            | Core |
| LT-Fluo-42 | AACGATTCACGCTGGTTGAGACGGCGTGCCAGCTGCATTGAG                   | Core |
| LT-Fluo-43 | TGCAATGGATAAAATCCGTGGTTTTTCGGCCAACGCGCGAAGC                  | Core |
| LT-Fluo-44 | CAAGCGCAAAGAATTGGGCTTTAACCTGAAAA                             | Core |
| LT-Fluo-45 | ATTATTGCTTTCAAACATAAAGGAATTGCGCGCCGAATATATTCGGTCCGACAG       | Core |
| LT-Fluo-46 | TTTGTGCTTTCCAGCAGACAGAGGGTAG                                 | Core |
| LT-Fluo-47 | GAGCCACCACCCTCATAAAGATTTCATAGTTG                             | Core |
| LT-Fluo-48 | AGCGAAAGGAGCGGGCAGCCGGCGGCCACTACGTGAAGAA                     | Core |
| LT-Fluo-49 | AACTACAAACGTATGGGAATTTTTTACGTTAACA                           | Core |
| LT-Fluo-50 | TTTACGATTGGAGAATGACCATAAAAGCGAGCTCCTTTTGATAAAAGT             | Core |
| LT-Fluo-51 | TCCGAATTTAGTTAAATCAGCTCATAAACAAAGTTTCGTTTCATGA               | Core |
| LT-Fluo-52 | TGAGTCATACAAAAATTCGATTAAGCGGAGTTAAGAAAACGGGT                 | Core |
| LT-Fluo-53 | AGGATCAGGCTTTTACCTCGCGTTTTTTTTCGGGATGGCCAAC                  | Core |
| LT-Fluo-54 | GGTTTATAGTCAGAAGCAAGCCGTTAATTG                               | Core |
| LT-Fluo-55 | AGAGGGTTGATATACCTCAGAACCGCCAC                                | Core |
| LT-Fluo-56 | TAGAATAATTCGCGTCTGGCCTTC                                     | Core |
| LT-Fluo-57 | AAACCCGGAATAGGTGATACGGAACCAATAGGAACGCATTTTCTTACAACGGCTTTGA   | Core |
| LT-Fluo-58 | TTTAAAAGCGCAGTCTCTTCATTAACCGTAACCGTTAAT                      | Core |
| LT-Fluo-59 | TTTCCGTTCCAGTAAGCTATTACGTTCTGCCCAATTG                        | Core |
| LT-Fluo-60 | CCAAGAACCACCACAGAGGTCAGAGTTTGAATTCAT                         | Core |
| LT-Fluo-61 | CATGCCAGCATTACTAATAGTAGTAGCAATAAAGCCCTCAACAAAGTTTAATTAACGAA  | Core |
| LT-Fluo-62 | TTAAGCATTAAACATCCACGAGCTGTTTAGCTATGTTTT                      | Core |

|             |                                                            |      |
|-------------|------------------------------------------------------------|------|
| LT-Fluo-63  | GGATTTTACTCCGAAATGTTGCGTATTGGGACCG                         | Core |
| LT-Fluo-64  | GAGTCATCAAAGAATAGGAGAGGCCGCCGC                             | Core |
| LT-Fluo-65  | TATCAGCTTGCTTTGTTGCGGGATCGTCAC                             | Core |
| LT-Fluo-66  | GCTTGCAGGGAGTTAAATACAGACCTGTAGGATA                         | Core |
| LT-Fluo-67  | CCTGCTCCATGTTAGAGTAATCTTGAAGAATAGAAATCGCGA                 | Core |
| LT-Fluo-68  | GCCATCGCCTGATAAATGTAATGCTACCTTATAGA                        | Core |
| LT-Fluo-69  | TCAAGTACAACGGAGATCAACCTATCAACTTATACATTAGG                  | Core |
| LT-Fluo-70  | GCTTATGAGGCCACCGAGCACTAAATCACCACACGTAGCTATTGC              | Core |
| LT-Fluo-71  | CAGGGCGATGAACGTGGC                                         | Core |
| LT-Fluo-72  | AACAGAACCCTTCTGCCATTGGCAAATATTA                            | Core |
| LT-Fluo-73  | GTTTAGACTGGATAGCAAAGAAGTGACAGATACATAACCAG                  | Core |
| LT-Fluo-74  | ATAATCGTACTCAGGAGAGCCCAAGAACAAC                            | Core |
| LT-Fluo-75  | TTCAACTAATTTTGCCAG                                         | Core |
| LT-Fluo-76  | AACAAAGTCAGAGGGTGCGCATTAAATCAGCCATACTTA                    | Core |
| LT-Fluo-77  | AACGAATTGCGTAGATTTTGATAATTTTAT                             | Core |
| LT-Fluo-78  | AAGAGCATGTTAGCAAACGCAA                                     | Core |
| LT-Fluo-79  | ACATTATCTATTAGACTAAAGTAT                                   | Core |
| LT-Fluo-80  | TCTGTTGAAATATCTGGATTTTCGGTCATAGGGGTATTAAGAACGCAGTATA       | Core |
| LT-Fluo-81  | AGAAAAACGTCACCAAAACCATTTGGGCGACA                           | Core |
| LT-Fluo-82  | AACTCCCAATCAAATAAGCTACACCAAGTTAAT                          | Core |
| LT-Fluo-83  | AGCATTTTTGTTTAAACATTA                                      | Core |
| LT-Fluo-84  | AAATGATTAAGCCGCACTAAACATTTGCTCTCAA                         | Core |
| LT-Fluo-85  | CAGTTACAAAGACGGGAG                                         | Core |
| LT-Fluo-86  | CCATTGCGCTTGATGAACCTTTTGTAGACGCTGAGAAGAGTCAATAGT           | Core |
| LT-Fluo-87  | GACAGCAACACTATCATAAAT                                      | Core |
| LT-Fluo-88  | GCAGTTTAGTACTGCGGAATCGTCAAAT                               | Core |
| LT-Fluo-89  | GTTAGAGGTTTTGAAGCTTTAGGACAATAAT                            | Core |
| LT-Fluo-90  | CCATATCAAATACAGATGAATATACAGT                               | Core |
| LT-Fluo-91  | GACCATTAATTTAGCTCCATTCCAAGAACCCCC                          | Core |
| LT-Fluo-92  | CACCCAGGCGGATAAGTGCCGTCG                                   | Core |
| LT-Fluo-93  | GAGGTCACCGGTATTCTAAACCAATCAATAATCGGCTAACA                  | Core |
| LT-Fluo-94  | GCTGAAACCATCGACTGTAGCGGTTTTACTCATCAGAAGGCCAGTAGG           | Core |
| LT-Fluo-95  | AAGGGAATTACAGATATGAGAACATTTACGAGCATGTAACGC                 | Core |
| LT-Fluo-96  | GTAGTAAAACAGAAATAAAGAAGCTTAGCGGGTTTTGAACAGTATGAGCAACACCGGA | Core |
| LT-Fluo-97  | GTGATAAATTCAGAAAA                                          | Core |
| LT-Fluo-98  | GAGAAGGTGTGAGTGAATTATAAAAAAGC                              | Core |
| LT-Fluo-99  | ACATACCGAAGCCCTTTCCAAAAACACCGGAATAAACAA                    | Core |
| LT-Fluo-100 | TAGTCATTTCACAAAATAGATTACCACAAGAATTGAGAAAT                  | Core |
| LT-Fluo-101 | GCCAGTAATAAGAGAATCGCTCAATTATCCGACTTGAGATCA                 | Core |
| LT-Fluo-102 | TGTACCGACAAAAGGTATTCTTACCGAGGCGGGTG                        | Core |
| LT-Fluo-103 | TTGATATTTAGTTAATGAATAAAAAGAAGAGATT                         | Core |
| LT-Fluo-104 | TCTGAGAGACTACCTTTCTGACCTAAATTTAA                           | Core |
| LT-Fluo-105 | GGCATTTTGAGAATAGCAAATGAGCCAGAGGC                           | Core |
| LT-Fluo-106 | ACCCATAAATACATAGCGATAGCTTAGG                               | Core |
| LT-Fluo-107 | GCGGGGCGAATAACTTTCCCTTAGAATCATGTAACGCGAGAAAACTTTTTAC       | Core |
| LT-Fluo-108 | AATTTTCATTTGAATTAACAACAAAGGCGT                             | Core |
| LT-Fluo-109 | GAGAAACAATAACGGAACGCTAACGAGCGTCT                           | Core |
| LT-Fluo-110 | GCTTTCAGGTCGCTAATATCAGAGGAAT                               | Core |
| LT-Fluo-111 | AATAGGAAGGATGAAATAGCAATAAAGACTCACATATAAAAGAAAGATT          | Core |
| LT-Fluo-112 | GTCTTTCCTTATGTCGCTATTCACCAGACGACGACAATAAAC                 | Core |
| LT-Fluo-113 | CGGAAGTAAGCAGATAGAAACGCATTGTAC                             | Core |
| LT-Fluo-114 | GACAGGATTTAGAAGTAAATATCCTTTATTGGAATA                       | Core |
| LT-Fluo-115 | TAAGAGGCTGTAAGAACCTCATGCGTT                                | Core |
| LT-Fluo-116 | GAAACCAAGTACCGCCATCGCTCAGTTG                               | Core |
| LT-Fluo-117 | AGATAGCAGCACCGTAAATTAGCACAAAATCTACCAGC                     | Core |
| LT-Fluo-118 | AAACAATATAATTAGGACGTCAATAGATAATCAACTAACGCGCAGGCTATTT       | Core |
| LT-Fluo-119 | CTTTAACCCCTCAATCAAGGAATTGTATCACCAGGAGGGA                   | Core |
| LT-Fluo-120 | AAACATTATGACCTGTAATATGTAACGTTAATATTTTGT                    | Core |
| LT-Fluo-121 | ATCGATGAACGGTAATCGTAAGTGATAGTAAAGATTCAAAG                  | Core |
| LT-Fluo-122 | CTTTTGCGGGAGAAGCCCTTATAAATGCAATGCCTGAGTAAT                 | Core |
| LT-Fluo-123 | AACTAGCATGTCAATCATATGTGTATAAGCAAATATTTAAAT                 | Core |
| LT-Fluo-124 | TTAGCGTTTGCCATCTTTCAACCTATTATTCTGAAACATGA                  | Core |
| LT-Fluo-125 | TGGCTTTTGATGATACAGGAGCCACCTCAGAGCCGCCACCA                  | Core |
| LT-Fluo-126 | TAATCAAATCACCGGAACCGAACCAGCCACCTCAGAGCCA                   | Core |
| LT-Fluo-127 | TGTAAGTAAAGTTTTAAATGCCCCCTGCCTATTTCCGA                     | Core |

|             |                                                               |             |
|-------------|---------------------------------------------------------------|-------------|
| LT-Fluo-128 | AACCACCAGCAGAAGATAAAAAAGCGGAATTATCATCATATTC                   | Core        |
| LT-Fluo-129 | TACAAACAATTGACAACCTCGCTTGCTGAACCTCAAATATCA                    | Core        |
| LT-Fluo-130 | CAGAGGTGAGGCGGTGAGTATATGAAAAATCTAAAGCATCAC                    | Core        |
| LT-Fluo-131 | TATTAATCCTTTGCCCGAACAAAGAAACCACCAGAAGG                        | Core        |
| LT-Fluo-132 | TGTGTGTGTGTGT CCAAGTTTTTGGGGTAAAGGGAGCCCCGCGG                 | Fluo handle |
| LT-Fluo-133 | TGTGTGTGTGTGT TTACCTCTAGCTGTACTCACATTAATTGAACCTGTGCAACAGTAAT  | Fluo handle |
| LT-Fluo-134 | TGTGTGTGTGTGT CGCATTTCACGCTCGTCCCTAGTGCTGATTTCCCATCGC         | Fluo handle |
| LT-Fluo-135 | TGTGTGTGTGTGT TAGGGGCCTATGATATTCATGCGCACGAAAAACGACGGGCGATTCTC | Fluo handle |
| LT-Fluo-136 | TGTGTGTGTGTGT GTAATATACATCACGGGATTTTAGACAGGTAT                | Fluo handle |
| LT-Fluo-137 | TGTGTGTGTGTGT CCGCCAGATACTTCACGCCAGAATCCTGTATGGTTTGAT         | Fluo handle |
| LT-Fluo-138 | TGTGTGTGTGTGT GCTTAAGTGTATCGGGTGCCTAATGAGTAATGAATCTTTTTAAA    | Fluo handle |
| LT-Fluo-139 | TGTGTGTGTGTGT GAGATAGAGTAAAAGAGCTGTCCATCATCAT                 | Fluo handle |
| LT-Fluo-140 | TGTGTGTGTGTGT AAAACGCCGCAAAATTTTTATAATCAGTGCCCGCGGATAAATACAA  | Fluo handle |
| LT-Fluo-141 | TGTGTGTGTGTGT TTGGTGTCACAACATACGACCGCCAAAACCTCT               | Fluo handle |
| LT-Fluo-142 | TGTGTGTGTGTGT CTCCGAATAACCCACCTTATGACAATGTAAGTTGAAAGGGGGATG   | Fluo handle |
| LT-Fluo-143 | TGTGTGTGTGTGT CTATTAACCATCAAGCTTGACGGGGAAGCTA                 | Fluo handle |
| LT-Fluo-144 | TGTGTGTGTGTGT GGAAGTTATAACCGCAATGACAACAACCAGGAACAGTTTCAATT    | Fluo handle |
| LT-Fluo-145 | TGTGTGTGTGTGT AAAACGATAGTAAGGACGATAAAAACCAATAA                | Fluo handle |
| LT-Fluo-146 | TGTGTGTGTGTGT AGAGGCAGAAACAAATCATAAGGGAACCCGGTGTATTGAGTAAAA   | Fluo handle |
| LT-Fluo-147 | TGTGTGTGTGTGT ATTATTAGCCAAAAGAGAGGCTTTTGCAGTCCAATACCGCCAAGTA  | Fluo handle |
| LT-Fluo-148 | TGTGTGTGTGTGT AAGGCACCTTGTATCGGAACGAGGCGCAGAGGCTGGTCAACGTAGAG | Fluo handle |
| LT-Fluo-149 | TGTGTGTGTGTGT ATAACAGTTTAATTACCAGACCGGAAGCAGAAAACGCCT         | Fluo handle |
| LT-Fluo-150 | TGTGTGTGTGTGT AAAACTGTGTGCGAAATCCGCCACGCTCCATTACTGGCTC        | Fluo handle |
| LT-Fluo-151 | TGTGTGTGTGTGT TGTCTGGGAGGTGCTTAATTCGAGCTTCATCA                | Fluo handle |
| LT-Fluo-152 | TGTGTGTGTGTGT AAATATGTTAGAGCAAAGACTTCAAATACTGA                | Fluo handle |
| LT-Fluo-153 | TGTGTGTGTGTGT CAACGGCGGCCGCTAGGTGAATTTCTTAGAAAACTAATGACATC    | Fluo handle |
| LT-Fluo-154 | TGTGTGTGTGTGT GGAAGAAAAGTCAGGATTAGAGAGTACCTTGA                | Fluo handle |
| LT-Fluo-155 | TGTGTGTGTGTGT GGAAGTAAAGGTGACCTTATACGCAAGTAAGAA               | Fluo handle |
| LT-Fluo-156 | TGTGTGTGTGTGT TGCAACCCAGAAACGAGCCTTTACAGAGAAGAT               | Fluo handle |
| LT-Fluo-157 | TGTGTGTGTGTGT CCTGAATTTATTTAATAAAAAACAGGGAAAATTGAGTTAACGTTTTG | Fluo handle |
| LT-Fluo-158 | TGTGTGTGTGTGT AGGTAAGGTGGCACTTATTACGCAAGTAAGAA                | Fluo handle |
| LT-Fluo-159 | TGTGTGTGTGTGT TTCAACCCGCAAGGAACTGGCATGATTGCTA                 | Fluo handle |
| LT-Fluo-160 | TGTGTGTGTGTGT AATCAAGGTTAGAAAATACATACATAAATATT                | Fluo handle |
| LT-Fluo-161 | TGTGTGTGTGTGT TAAATAATTCATCTTTAACCTCCGGCTTAGATTATAATGGACTCA   | Fluo handle |
| LT-Fluo-162 | TGTGTGTGTGTGT ATCATAATTCAAATGGTTATATAACTATCTTG                | Fluo handle |
| LT-Fluo-163 | TGTGTGTGTGTGT GCCAAAGGTTTATTATAATAACGGAATATTA                 | Fluo handle |
| LT-Fluo-164 | TGTGTGTGTGTGT GCTTAATTCGAGCCTGTTTATCAACAATATCCTAAAGCAAGCCGTC  | Fluo handle |
| LT-Fluo-165 | TGTGTGTGTGTGT AAGCCAATAAAGTTCAGCTAATGCAGA                     | Fluo handle |
| LT-Fluo-166 | TGTGTGTGTGTGT CTGTTTACAAGAATGCTGATGCAATCAATTAATCTTGCTTCTGA    | Fluo handle |
| LT-Fluo-167 | TGTGTGTGTGTGT ATACAAAAGTAATCTGTATCGCAAGATATCATCCGACTT         | Fluo handle |
